# Supplementary material
Source: PubMed Central journal article supplement (PMC4390271)
Supplement: supp_M114.044479_mcp.M114.044479-1.pdf [file supp_M114.044479_mcp.M114.044479-1.pdf]

Supplementary information— G Eagle, J Zhuang, et al.

**Supplementary Table S1. Proteins found to be significantly differentially expressed ( $P < 0.05$ ) between UM-CLL and M-CLL in previous proteomic studies**

| Accession | Protein                                                       | Expression (UM/M) | Sample number |       | Method                            | Reference             |
|-----------|---------------------------------------------------------------|-------------------|---------------|-------|-----------------------------------|-----------------------|
|           |                                                               |                   | UM-CLL        | M-CLL |                                   |                       |
| P31946    | 14-3-3 protein beta                                           | ↓                 | 6             | 6     | 2D-GE + MALDI-ToF-MS              | Cochran et al (2003)  |
| P39687    | Acidic leucine-rich nuclear phosphoprotein 32 family member A | ↑                 | 1             | 1     | ICAT + LC-MS/MS                   | Barnidge et al (2005) |
| Q9UKV3    | Apoptotic chromatin condensation inducer in the nucleus       | ↓                 | 6             | 22    | iTRAQ + MALDI MS/MS               | Alsagaby et al (2014) |
| P10644    | cAMP-dependent protein kinase type I-alpha regulatory subunit | ↑                 | 3             | 3     | 2D-DIGE + MALDI-ToF-MS + LC-MS/MS | Perrot et al (2011)   |
| P10606    | Cytochrome c oxidase subunit 5B, mitochondrial                | ↓                 | 1             | 1     | ICAT + LC-MS/MS                   | Barnidge et al (2005) |
| P14854    | Cytochrome c oxidase subunit 6B1                              | ↓                 | 1             | 1     | ICAT + LC-MS/MS                   | Barnidge et al (2005) |
| P19388    | DNA-directed RNA polymerases I, II, and III subunit RPABC1    | ↑                 | 3             | 3     | 2D-DIGE + MALDI-ToF-MS + LC-MS/MS | Perrot et al (2011)   |
| P47757    | F-actin-capping protein subunit beta                          | ↓                 | 6             | 6     | 2D-GE + MALDI-ToF-MS              | Cochran et al (2003)  |
| P07203    | Glutathione peroxidase 1                                      | ↑                 | 1             | 1     | ICAT + LC-MS/MS                   | Barnidge et al (2005) |
| P14317    | Hematopoietic lineage cell-specific protein                   | ↑                 | 3             | 3     | 2D-DIGE + MALDI-ToF-MS + LC-MS/MS | Perrot et al (2011)   |
| P14317    | Hematopoietic lineage cell-specific protein                   | ↓                 | 3             | 3     | 2D-DIGE + MALDI-ToF-MS + LC-MS/MS | Perrot et al (2011)   |
| P68871    | Hemoglobin subunit beta                                       | ↓                 | 1             | 1     | ICAT + LC-MS/MS                   | Barnidge et al (2005) |
| P02042    | Hemoglobin subunit delta                                      | ↓                 | 1             | 1     | ICAT + LC-MS/MS                   | Barnidge et al (2005) |
| P22626    | Heterogeneous nuclear ribonucleoproteins A2/B1                | ↑                 | 1             | 1     | ICAT + LC-MS/MS                   | Barnidge et al (2005) |
| P30484    | HLA class I histocompatibility antigen, B-46 alpha chain      | ↓                 | 1             | 1     | ICAT + LC-MS/MS                   | Barnidge et al (2005) |
| P08865    | Laminin-binding protein precursor                             | ↓                 | 6             | 6     | 2D-GE + MALDI-ToF-MS              | Cochran et al (2003)  |
| Q14847    | LIM and SH3 domain protein 1                                  | ↑                 | 6             | 22    | iTRAQ + MALDI MS/MS               | Alsagaby et al (2014) |

|  |        |                                                           |   |   |    |                                   |                         |
|--|--------|-----------------------------------------------------------|---|---|----|-----------------------------------|-------------------------|
|  | P06748 | Nucleophosmin                                             | ↑ | 4 | 4  | 2D-GE + LC-MS/MS                  | Rees-Unwin et al (2009) |
|  | P06748 | Nucleophosmin/B23                                         | ↓ | 6 | 6  | 2D-GE + MALDI-ToF-MS              | Cochran et al (2003)    |
|  | P09874 | Poly [ADP-ribose] polymerase 1                            | ↑ | 1 | 1  | ICAT + LC-MS/MS                   | Barnidge et al (2005)   |
|  | P05109 | Protein S100-A8                                           | ↑ | 1 | 1  | ICAT + LC-MS/MS                   | Barnidge et al (2005)   |
|  | P10768 | S-formylglutathione hydrolase                             | ↑ | 3 | 3  | 2D-DIGE + MALDI-ToF-MS + LC-MS/MS | Perrot et al (2011)     |
|  | P10768 | S-formylglutathione hydrolase                             | ↑ | 3 | 3  | 2D-DIGE + MALDI-ToF-MS + LC-MS/MS | Perrot et al (2011)     |
|  | Q86XK3 | Swi5-dependent recombination DNA repair protein 1 homolog | ↓ | 1 | 1  | ICAT + LC-MS/MS                   | Barnidge et al (2005)   |
|  | Q8NBS9 | Thioredoxin domain-containing protein 5                   | ↓ | 1 | 1  | ICAT + LC-MS/MS                   | Barnidge et al (2005)   |
|  | P67936 | Tropomyosin alpha-4 chain                                 | ↓ | 6 | 22 | iTRAQ + MALDI MS/MS               | Alsagaby et al (2014)   |
|  | P08670 | Vimentin                                                  | ↓ | 1 | 1  | ICAT + LC-MS/MS                   | Barnidge et al (2005)   |

**Supplementary Table S2. List of 274 proteins found by iTRAQ-based mass spectrometry to be significantly differentially expressed between M-CLL and UM-CLL samples ( $P < 0.05$ ).**

| #  | SwissProt Acc. No. | Name                                                     | Average no. of unique peptides (95%) $\pm$ SD | Average no. of peptides (95%) | Average % coverage (95) | Fold Change UM/M | <i>P</i> |
|----|--------------------|----------------------------------------------------------|-----------------------------------------------|-------------------------------|-------------------------|------------------|----------|
| 1  | Q92665             | 28S ribosomal protein S31, mitochondrial                 | 4.0 $\pm$ 1.0                                 | 4.00                          | 15.02                   | 1.4              | 0.003    |
| 2  | O95861             | 3'(2'),5'-biphosphate nucleotidase 1                     | 5.3 $\pm$ 2.1                                 | 8.33                          | 26.95                   | -2.3             | 0.006    |
| 3  | Q96GC5             | 39S ribosomal protein L48, mitochondrial                 | 1.5 $\pm$ 0.7                                 | 2.00                          | 8.25                    | 1.3              | 0.001    |
| 4  | P18077             | 60S ribosomal protein L35a                               | 1.3 $\pm$ 0.6                                 | 1.33                          | 9.09                    | 1.5              | 0.024    |
| 5  | P62424             | 60S ribosomal protein L7a                                | 2.7 $\pm$ 0.6                                 | 2.7                           | 10.40                   | -1.3             | 0.017    |
| 6  | Q01813             | 6-phosphofructokinase type C                             | 17.7 $\pm$ 3.1                                | 28.33                         | 32.82                   | 2.7              | 0.042    |
| 7  | P68032             | Actin, alpha cardiac muscle 1***                         | 7                                             | 123.00                        | 53.05                   | -1.5             | 0.011    |
| 8  | P63261             | Actin, cytoplasmic 2                                     | 67.0 $\pm$ 25.5                               | 213.67                        | 73.51                   | -2.7             | 0.014    |
| 9  | O15143             | Actin-related protein 2/3 complex subunit 1B             | 7.3 $\pm$ 2.9                                 | 9.67                          | 21.33                   | -1.4             | 0.038    |
| 10 | O15144             | Actin-related protein 2/3 complex subunit 2              | 14.3 $\pm$ 2.1                                | 21.33                         | 48.11                   | -1.8             | 0.001    |
| 11 | O15145             | Actin-related protein 2/3 complex subunit 3              | 5.7 $\pm$ 2.5                                 | 12.67                         | 38.02                   | -1.6             | 0.014    |
| 12 | Q9BPX5             | Actin-related protein 2/3 complex subunit 5-like protein | 4.0 $\pm$ 1.0                                 | 4.67                          | 32.90                   | -1.4             | 0.011    |
| 13 | P61158             | Actin-related protein 3                                  | 17.3 $\pm$ 4.0                                | 28.00                         | 53.43                   | -1.6             | 0.031    |
| 14 | O95433             | Activator of 90 kDa heat shock protein ATPase homolog 1  | 4.3 $\pm$ 1.2                                 | 5.67                          | 19.23                   | 1.6              | 0.026    |
| 15 | Q9NPJ3             | Acyl-coenzyme A thioesterase 13                          | 2.0 $\pm$ 1.0                                 | 2.00                          | 10.95                   | 2.0              | 0.029    |
| 16 | Q6P587             | Acylpyruvase FAHD1, mitochondrial                        | 1.3 $\pm$ 0.6                                 | 1.67                          | 12.35                   | 1.5              | 0.011    |
| 17 | P55263             | Adenosine kinase                                         | 8.3 $\pm$ 3.1                                 | 12.33                         | 34.26                   | -3.0             | 0.007    |
| 18 | Q01518             | Adenylyl cyclase-associated protein 1                    | 16.3 $\pm$ 3.5                                | 30.33                         | 37.40                   | -1.8             | 0.014    |
| 19 | P62330             | ADP-ribosylation factor 6                                | 2.7 $\pm$ 0.6                                 | 2.67                          | 20.00                   | -1.8             | 0.013    |
| 20 | Q9NVJ2             | ADP-ribosylation factor-like protein 8B                  | 2.0 $\pm$ 1.0                                 | 4.33                          | 23.84                   | -2.2             | 0.020    |
| 21 | Q9Y2D5             | A-kinase anchor protein 2                                | 8.7 $\pm$ 5.5                                 | 10.00                         | 14.67                   | 2.0              | 0.001    |
| 22 | P35611             | Alpha-adducin                                            | 6.0 $\pm$ 2.6                                 | 7.33                          | 12.66                   | -1.6             | 0.004    |

|    |        |                                                                         |            |       |       |      |       |
|----|--------|-------------------------------------------------------------------------|------------|-------|-------|------|-------|
| 23 | P61163 | Alpha-centractin                                                        | 4.7 ± 0.6  | 6.33  | 21.10 | -1.4 | 0.012 |
| 24 | Q01432 | AMP deaminase 3                                                         | 1.3 ± 0.6  | 1.33  | 2.17  | -1.8 | 0.001 |
| 25 | Q9H1A4 | Anaphase-promoting complex subunit 1**                                  | 1          | 1.00  | 0.93  | 1.6  | 0.031 |
| 26 | P04083 | Annexin A1                                                              | 9.7 ± 3.1  | 11.33 | 40.75 | -2.8 | 0.011 |
| 27 | P08758 | Annexin A5                                                              | 22.0 ± 3.5 | 44.33 | 72.71 | 2.6  | 0.006 |
| 28 | P08133 | Annexin A6                                                              | 37.0 ± 5.2 | 66.67 | 62.36 | -2.0 | 0.027 |
| 29 | P63010 | AP-2 complex subunit beta                                               | 11.3 ± 7.2 | 17.67 | 20.92 | -1.5 | 0.010 |
| 30 | Q96CW1 | AP-2 complex subunit mu                                                 | 1.3 ± 0.6  | 1.67  | 5.36  | 2.2  | 0.014 |
| 31 | O14727 | Apoptotic protease-activating factor 1                                  | 2.7 ± 1.2  | 2.67  | 2.75  | -1.5 | 0.036 |
| 32 | Q15057 | Arf-GAP with coiled-coil, ANK repeat and PH domain-containing protein 2 | 4.3 ± 0.6  | 5.00  | 10.63 | -1.3 | 0.036 |
| 33 | Q99766 | ATP synthase subunit s, mitochondrial                                   | 1.3 ± 0.6  | 1.67  | 6.82  | -1.2 | 0.041 |
| 34 | Q9NVI7 | ATPase family AAA domain-containing protein 3A                          | 6.3 ± 2.1  | 7.67  | 16.56 | 1.4  | 0.041 |
| 35 | Q9UG63 | ATP-binding cassette sub-family F member 2                              | 1.0 ± 0.0  | 1.00  | 2.09  | -1.2 | 0.023 |
| 36 | O76031 | ATP-dependent Clp protease ATP-binding subunit clpX-like, mitochondrial | 2.7 ± 0.6  | 2.67  | 5.95  | 1.1  | 0.021 |
| 37 | Q8NDB2 | B-cell scaffold protein with ankyrin repeats                            | 3.0 ± 1.7  | 3.67  | 6.88  | -2.1 | 0.002 |
| 38 | P16278 | Beta-galactosidase                                                      | 1.7 ± 1.2  | 1.67  | 3.59  | -1.3 | 0.042 |
| 39 | P55957 | BH3-interacting domain death agonist                                    | 3.0 ± 1.0  | 3.33  | 20.34 | -2.3 | 0.018 |
| 40 | Q9Y6D6 | Brefeldin A-inhibited guanine nucleotide-exchange protein 1             | 2.0 ± 0.0  | 2.00  | 1.14  | -1.4 | 0.047 |
| 41 | Q9UBW5 | Bridging integrator 2                                                   | 4.7 ± 1.5  | 5.33  | 14.40 | -1.7 | 0.000 |
| 42 | Q8IWX8 | Calcium homeostasis endoplasmic reticulum protein                       | 5.7 ± 2.3  | 6.67  | 9.35  | 1.4  | 0.034 |
| 43 | Q8N4T8 | Carbonyl reductase family member 4                                      | 2.3 ± 0.6  | 2.33  | 17.44 | 1.3  | 0.034 |
| 44 | Q99467 | CD180 antigen                                                           | 4.0 ± 0.0  | 4.33  | 9.08  | -1.5 | 0.014 |
| 45 | P16070 | CD44 antigen                                                            | 4.3 ± 0.6  | 6.33  | 7.32  | 1.4  | 0.012 |
| 46 | P30260 | Cell division cycle protein 27 homolog***                               | 1          | 2.00  | 2.55  | -1.5 | 0.041 |
| 47 | P62633 | Cellular nucleic acid-binding protein                                   | 2.3 ± 1.5  | 3.00  | 16.95 | 1.3  | 0.027 |
| 48 | Q9H444 | Charged multivesicular body protein 4b                                  | 3.3 ± 2.1  | 4.00  | 22.47 | -1.7 | 0.022 |

|    |        |                                                            |            |       |       |      |       |
|----|--------|------------------------------------------------------------|------------|-------|-------|------|-------|
| 49 | Q8NE62 | Choline dehydrogenase, mitochondrial                       | 4.0 ± 2.0  | 5.00  | 11.84 | 1.7  | 0.033 |
| 50 | Q8N0X4 | Citrate lyase subunit beta-like protein, mitochondrial     | 4.7 ± 0.6  | 6.00  | 22.06 | -1.7 | 0.028 |
| 51 | Q5T0F9 | Coiled-coil and C2 domain-containing protein 1B            | 3.3 ± 2.1  | 3.67  | 4.70  | -1.3 | 0.024 |
| 52 | Q14011 | Cold-inducible RNA-binding protein                         | 5.0 ± 0.0  | 8.00  | 32.75 | 1.4  | 0.023 |
| 53 | O14618 | Copper chaperone for superoxide dismutase                  | 3.3 ± 0.6  | 4.67  | 18.98 | 1.3  | 0.017 |
| 54 | P31146 | Coronin-1A                                                 | 20.7 ± 4.9 | 33.33 | 42.66 | -1.8 | 0.034 |
| 55 | Q93034 | Cullin-5***                                                | 2          | 2.00  | 2.44  | -1.4 | 0.008 |
| 56 | O14976 | Cyclin-G-associated kinase                                 | 2.7 ± 1.5  | 2.67  | 3.08  | -1.7 | 0.005 |
| 57 | P00167 | Cytochrome b5                                              | 1.7 ± 0.6  | 1.67  | 18.66 | 1.9  | 0.047 |
| 58 | O43639 | Cytoplasmic protein NCK2***                                | 1.5 ± 0.7  | 1.50  | 5.26  | -1.3 | 0.045 |
| 59 | Q96KP4 | Cytosolic non-specific dipeptidase                         | 19.7 ± 4.2 | 32.50 | 55.37 | -1.8 | 0.038 |
| 60 | Q9BTC0 | Death-inducer obliterator 1                                | 7.0 ± 1.0  | 8.67  | 5.30  | 1.3  | 0.013 |
| 61 | Q92608 | Dedicator of cytokinesis protein 2                         | 3.7 ± 1.2  | 4.00  | 2.71  | -1.8 | 0.037 |
| 62 | Q9BTZ2 | Dehydrogenase/reductase SDR family member 4                | 4.0 ± 1.7  | 5.00  | 17.87 | 1.3  | 0.017 |
| 63 | Q5QJE6 | Deoxynucleotidyltransferase terminal-interacting protein 2 | 3.7 ± 3.1  | 4.00  | 7.89  | 1.3  | 0.003 |
| 64 | P06746 | DNA polymerase beta                                        | 1.3 ± 0.6  | 2.00  | 7.36  | 1.3  | 0.001 |
| 65 | Q13426 | DNA repair protein XRCC4**                                 | 1          | 1.00  | 5.06  | 1.4  | 0.040 |
| 66 | P11387 | DNA topoisomerase 1                                        | 14.3 ± 5.5 | 18.67 | 22.18 | 2.2  | 0.025 |
| 67 | Q13422 | DNA-binding protein Ikaros                                 | 1.7 ± 0.6  | 2.33  | 3.98  | -1.6 | 0.049 |
| 68 | O14593 | DNA-binding protein RFXANK                                 | 1.5 ± 0.7  | 1.50  | 10.38 | 1.5  | 0.003 |
| 69 | P78527 | DNA-dependent protein kinase catalytic subunit             | 21.0 ± 8.9 | 23.00 | 7.11  | -1.8 | 0.002 |
| 70 | O15446 | DNA-directed RNA polymerase I subunit RPA34                | 1.5 ± 0.7  | 1.50  | 7.55  | 1.8  | 0.017 |
| 71 | P31689 | DnaJ homolog subfamily A member 1                          | 6.3 ± 1.2  | 8.00  | 26.03 | -1.5 | 0.022 |
| 72 | P25686 | DnaJ homolog subfamily B member 2                          | 1.3 ± 0.6  | 1.67  | 5.56  | 1.3  | 0.016 |
| 73 | O75937 | DnaJ homolog subfamily C member 8                          | 5.0 ± 1.0  | 7.00  | 20.82 | 1.4  | 0.019 |

|    |        |                                                               |             |        |       |      |       |
|----|--------|---------------------------------------------------------------|-------------|--------|-------|------|-------|
| 74 | O60762 | Dolichol-phosphate mannosyltransferase                        | 1.7 ± 0.6   | 2.33   | 12.05 | -1.2 | 0.044 |
| 75 | Q02750 | Dual specificity mitogen-activated protein kinase kinase 1    | 3.3 ± 1.5   | 4.33   | 12.13 | -1.4 | 0.007 |
| 76 | Q13627 | Dual specificity tyrosine-phosphorylation-regulated kinase 1A | 1.0 ± 0.0   | 1.67   | 2.58  | -1.2 | 0.028 |
| 77 | P50570 | Dynamin-2                                                     | 9.0 ± 2.6   | 9.67   | 13.41 | -1.3 | 0.048 |
| 78 | Q15075 | Early endosome antigen 1                                      | 5.7 ± 2.5   | 7.00   | 5.34  | -1.7 | 0.037 |
| 79 | Q96C19 | EF-hand domain-containing protein D2                          | 7.3 ± 2.5   | 8.67   | 32.50 | -2.0 | 0.049 |
| 80 | O95163 | Elongator complex protein 1*                                  | 1.0 ± 0.0   | 1.00   | 0.79  | 1.2  | 0.011 |
| 81 | Q96DZ1 | Endoplasmic reticulum lectin 1                                | 2.5 ± 0.7   | 3.00   | 10.04 | 1.6  | 0.024 |
| 82 | P30040 | Endoplasmic reticulum resident protein 29                     | 12.7 ± 2.5  | 22.00  | 54.53 | 1.6  | 0.013 |
| 83 | P14625 | Endoplasmin                                                   | 33.3 ± 4.6  | 51.00  | 44.66 | 1.7  | 0.012 |
| 84 | Q9NTX5 | Enoyl-CoA hydratase domain-containing protein 1               | 4.3 ± 0.6   | 5.33   | 24.00 | -1.3 | 0.038 |
| 85 | P27105 | Erythrocyte band 7 integral membrane protein***               | 3           | 3.00   | 16.67 | -1.5 | 0.005 |
| 86 | Q92506 | Estradiol 17-beta-dehydrogenase 8                             | 4.3 ± 1.2   | 6.33   | 24.40 | 1.3  | 0.027 |
| 87 | O75822 | Eukaryotic translation initiation factor 3 subunit J          | 2.0 ± 0.0   | 2.67   | 12.28 | 1.2  | 0.026 |
| 88 | Q15024 | Exosome complex component RRP42                               | 6.0 ± 1.0   | 6.67   | 30.59 | 1.5  | 0.003 |
| 89 | P52907 | F-actin-capping protein subunit alpha-1                       | 11.7 ± 1.5  | 36.67  | 58.51 | -1.5 | 0.027 |
| 90 | P47756 | F-actin-capping protein subunit beta                          | 9.7 ± 1.5   | 17.00  | 39.95 | -1.3 | 0.040 |
| 91 | Q92945 | Far upstream element-binding protein 2                        | 22.7 ± 3.2  | 42.67  | 42.47 | 1.5  | 0.019 |
| 92 | Q9UNN5 | FAS-associated factor 1                                       | 1.3 ± 0.6   | 1.67   | 3.44  | -1.3 | 0.025 |
| 93 | Q86UX7 | Fermitin family homolog 3                                     | 14.7 ± 4.0  | 19.00  | 33.58 | -1.9 | 0.014 |
| 94 | P02675 | Fibrinogen beta chain                                         | 8.0 ± 3.6   | 12.00  | 23.01 | -6.0 | 0.049 |
| 95 | P02679 | Fibrinogen gamma chain                                        | 7.0 ± 1.4   | 7.50   | 15.68 | -9.3 | 0.044 |
| 96 | P21333 | Filamin-A                                                     | 81.7 ± 18.9 | 131.00 | 43.50 | -3.0 | 0.006 |
| 97 | O75369 | Filamin-B                                                     | 14.7 ± 4.7  | 21.67  | 9.72  | 2.4  | 0.000 |
| 98 | Q5T1M5 | FK506-binding protein 15                                      | 3.7 ± 0.6   | 4.33   | 4.46  | -1.4 | 0.007 |
| 99 | Q96GK7 | Fumarylacetoacetate hydrolase domain-                         | 2.3 ± 0.6   | 3.00   | 13.16 | 1.2  | 0.003 |

|     |         |                                                                               |             |       |       |      |       |
|-----|---------|-------------------------------------------------------------------------------|-------------|-------|-------|------|-------|
|     |         | containing protein 2A***                                                      |             |       |       |      |       |
| 100 | Q06546  | GA-binding protein alpha chain                                                | 6.7 ± 1.5   | 7.67  | 19.90 | 1.5  | 0.012 |
| 101 | Q06547  | GA-binding protein subunit beta-1                                             | 2.0 ± 1.7   | 2.00  | 3.80  | 1.3  | 0.002 |
| 102 | Q9UEY8  | Gamma-adducin                                                                 | 7.7 ± 1.5   | 9.00  | 17.66 | -1.6 | 0.004 |
| 103 | P17900  | Ganglioside GM2 activator                                                     | 2.0 ± 1.0   | 2.33  | 16.75 | 1.9  | 0.026 |
| 104 | O14893  | Gem-associated protein 2                                                      | 1.0 ± 0.0   | 1.00  | 4.64  | 1.4  | 0.049 |
| 105 | P11413  | Glucose-6-phosphate 1-dehydrogenase                                           | 14.7 ± 3.2  | 20.67 | 40.45 | -1.6 | 0.022 |
| 106 | P07203  | Glutathione peroxidase 1                                                      | 10.0 ± 2.0  | 17.00 | 63.22 | 1.5  | 0.029 |
| 107 | P00390  | Glutathione reductase, mitochondrial                                          | 11.0 ± 3.5  | 13.67 | 33.78 | -1.6 | 0.039 |
| 108 | P09488  | Glutathione S-transferase Mu 1                                                | 3.3 ± 0.6   | 5.33  | 23.55 | -2.6 | 0.045 |
| 109 | P41250  | Glycyl-tRNA synthetase                                                        | 7.0 ± 1.0   | 9.00  | 16.92 | -1.5 | 0.013 |
| 110 | Q08378  | Golgin subfamily A member 3                                                   | 10.0 ± 1.7  | 12.33 | 10.59 | -1.6 | 0.018 |
| 111 | P04899  | Guanine nucleotide-binding protein G(i) subunit alpha-2                       | 11.7 ± 3.1  | 18.00 | 49.58 | -1.6 | 0.006 |
| 112 | Q724V5  | Hepatoma-derived growth factor-related protein 2                              | 4.7 ± 0.6   | 7.00  | 11.87 | 1.8  | 0.003 |
| 113 | Q99729  | Heterogeneous nuclear ribonucleoprotein A/B                                   | 6.3 ± 0.6   | 10.67 | 23.59 | 1.4  | 0.039 |
| 114 | P09651  | Heterogeneous nuclear ribonucleoprotein A1                                    | 23.0 ± 6.1  | 57.00 | 46.15 | 1.7  | 0.022 |
| 115 | P61978  | Heterogeneous nuclear ribonucleoprotein K                                     | 25.3 ± 3.8  | 61.33 | 53.49 | 1.7  | 0.006 |
| 116 | P16402  | Histone H1.3                                                                  | 17.3 ± 11.5 | 58.33 | 50.68 | -2.0 | 0.011 |
| 117 | O43719  | HIV Tat-specific factor 1                                                     | 4.0 ± 1.7   | 4.33  | 9.45  | 1.3  | 0.018 |
| 118 | P20036  | HLA class II histocompatibility antigen, DP alpha 1 chain                     | 5.7 ± 1.5   | 8.67  | 25.51 | 2.0  | 0.020 |
| 119 | P01623† | Ig kappa chain V-III region***                                                | 4           | 4.00  | 35.32 | 81.1 | 0.047 |
| 120 | P01871  | Ig mu chain C region                                                          | 11.3 ± 3.1  | 21.67 | 31.42 | 2.3  | 0.015 |
| 121 | O14920  | Inhibitor of nuclear factor kappa-B kinase subunit beta                       | 2.7 ± 0.6   | 2.67  | 3.97  | -1.3 | 0.017 |
| 122 | Q8NBZ0  | INO80 complex subunit E                                                       | 1.7 ± 0.6   | 2.00  | 12.84 | 1.4  | 0.008 |
| 123 | Q6PFW1  | Inositol hexakisphosphate and diphosphoinositol-pentakisphosphate kinase 1*** | 2           | 2.00  | 1.74  | -1.7 | 0.013 |

|     |        |                                                                             |            |       |       |      |       |
|-----|--------|-----------------------------------------------------------------------------|------------|-------|-------|------|-------|
| 124 | P20701 | Integrin alpha-L                                                            | 2.0 ± 0.0  | 2.00  | 2.62  | -2.1 | 0.023 |
| 125 | P11215 | Integrin alpha-M                                                            | 6.0 ± 4.4  | 6.33  | 7.09  | -2.6 | 0.010 |
| 126 | P05107 | Integrin beta-2                                                             | 6.3 ± 2.3  | 7.00  | 12.87 | -2.3 | 0.046 |
| 127 | Q9BWU0 | Kanadaplin*                                                                 | 1.0 ± 0.0  | 1.00  | 2.01  | 1.2  | 0.018 |
| 128 | Q07666 | KH domain-containing, RNA-binding, signal transduction-associated protein 1 | 8.3 ± 2.1  | 11.00 | 17.38 | 1.6  | 0.026 |
| 129 | O00139 | Kinesin-like protein KIF2A                                                  | 3.3 ± 3.2  | 3.67  | 5.57  | -1.3 | 0.008 |
| 130 | Q9Y2S2 | Lambda-crystallin homolog                                                   | 1.7 ± 1.2  | 1.67  | 6.17  | -1.3 | 0.036 |
| 131 | Q14696 | LDLR chaperone MESD                                                         | 2.7 ± 1.5  | 2.67  | 15.81 | -1.3 | 0.048 |
| 132 | O95232 | Luc7-like protein 3                                                         | 4.3 ± 1.2  | 8.00  | 14.35 | 1.5  | 0.004 |
| 133 | Q9UJU2 | Lymphoid enhancer-binding factor 1                                          | 2.3 ± 1.2  | 2.33  | 9.61  | 1.2  | 0.019 |
| 134 | P42785 | Lysosomal Pro-X carboxypeptidase                                            | 3.0 ± 1.0  | 3.33  | 10.49 | 1.5  | 0.021 |
| 135 | P61626 | Lysozyme C                                                                  | 3.0 ± 1.7  | 3.67  | 24.78 | -3.9 | 0.003 |
| 136 | P49137 | MAP kinase-activated protein kinase 2*                                      | 1.0 ± 0.0  | 1.00  | 4.25  | -1.4 | 0.043 |
| 137 | O43312 | Metastasis suppressor protein 1                                             | 3.0 ± 2.0  | 3.33  | 7.64  | -1.8 | 0.029 |
| 138 | O95983 | Methyl-CpG-binding domain protein 3                                         | 1.3 ± 0.6  | 1.33  | 5.84  | 1.1  | 0.013 |
| 139 | P27816 | Microtubule-associated protein 4                                            | 9.0 ± 2.0  | 10.33 | 14.61 | 1.4  | 0.036 |
| 140 | Q02978 | Mitochondrial 2-oxoglutarate/malate carrier protein                         | 2.0 ± 1.0  | 2.33  | 10.83 | -1.5 | 0.010 |
| 141 | O60220 | Mitochondrial import inner membrane translocase subunit Tim8 A              | 1.7 ± 0.6  | 1.67  | 18.90 | 1.8  | 0.010 |
| 142 | O94826 | Mitochondrial import receptor subunit TOM70                                 | 7.3 ± 3.5  | 8.67  | 19.08 | 1.6  | 0.027 |
| 143 | Q6NZ67 | Mitotic-spindle organizing protein 2B                                       | 2.0 ± 0.0  | 2.00  | 22.15 | 1.4  | 0.001 |
| 144 | O43148 | mRNA cap guanine-N7 methyltransferase                                       | 3.7 ± 0.6  | 4.67  | 11.55 | 1.3  | 0.015 |
| 145 | O00499 | Myc box-dependent-interacting protein 1                                     | 5.0 ± 2.0  | 5.67  | 14.22 | -1.6 | 0.004 |
| 146 | Q9P2K5 | Myelin expression factor 2***                                               | 2          | 2.00  | 5.83  | 1.4  | 0.016 |
| 147 | P41218 | Myeloid cell nuclear differentiation antigen                                | 7.3 ± 2.5  | 13.33 | 20.80 | -7.2 | 0.000 |
| 148 | P05164 | Myeloperoxidase                                                             | 14.0 ± 7.8 | 17.33 | 23.98 | -4.0 | 0.033 |
| 149 | P60660 | Myosin light polypeptide 6                                                  | 11.7 ± 1.5 | 35.33 | 56.29 | -1.8 | 0.023 |



|     |        |                                                          |             |        |       |      |       |
|-----|--------|----------------------------------------------------------|-------------|--------|-------|------|-------|
| 150 | P24844 | Myosin regulatory light polypeptide 9                    | 4.5 ± 3.5   | 14.00  | 56.40 | -5.5 | 0.029 |
| 151 | P35579 | Myosin-9                                                 | 95.0 ± 23.5 | 218.33 | 52.69 | -2.9 | 0.002 |
| 152 | B0I1T2 | Myosin-Ig                                                | 6.0 ± 2.6   | 6.33   | 9.40  | -1.9 | 0.005 |
| 153 | Q13459 | Myosin-IXb                                               | 2.3 ± 1.5   | 3.00   | 2.13  | -1.4 | 0.036 |
| 154 | P34059 | N-acetylgalactosamine-6-sulfatase                        | 2.0 ± 1.0   | 2.00   | 4.09  | 2.4  | 0.037 |
| 155 | P41227 | N-alpha-acetyltransferase 10                             | 2.3 ± 0.6   | 2.67   | 13.05 | -1.7 | 0.010 |
| 156 | Q9BYT8 | Neurolysin, mitochondrial                                | 7.3 ± 1.5   | 9.33   | 13.59 | 1.8  | 0.023 |
| 157 | Q15233 | Non-POU domain-containing octamer-binding protein        | 17.0 ± 3.6  | 38.67  | 37.51 | 1.6  | 0.031 |
| 158 | Q00653 | Nuclear factor NF-kappa-B p100 subunit                   | 3.3 ± 1.2   | 4.33   | 7.00  | -1.3 | 0.035 |
| 159 | O75376 | Nuclear receptor corepressor 1                           | 7.7 ± 3.8   | 7.67   | 4.69  | 1.3  | 0.026 |
| 160 | Q9Y618 | Nuclear receptor corepressor 2                           | 1.7 ± 1.2   | 1.67   | 0.96  | 1.2  | 0.041 |
| 161 | Q14978 | Nucleolar and coiled-body phosphoprotein 1               | 4.7 ± 0.6   | 5.33   | 7.49  | 1.5  | 0.021 |
| 162 | Q86U38 | Nucleolar protein 9                                      | 1.3 ± 0.6   | 1.33   | 2.99  | -2.3 | 0.035 |
| 163 | Q9NQR4 | Omega-amidase NIT2                                       | 7.3 ± 0.6   | 9.67   | 36.95 | 1.4  | 0.037 |
| 164 | Q9BZF1 | Oxysterol-binding protein-related protein 8              | 3.7 ± 1.5   | 3.67   | 5.66  | -1.3 | 0.023 |
| 165 | Q9NVE7 | Pantothenate kinase 4                                    | 1.5 ± 0.7   | 1.50   | 2.39  | 1.4  | 0.035 |
| 166 | Q96HC4 | PDZ and LIM domain protein 5                             | 1.0 ± 0.0   | 1.50   | 2.77  | -1.5 | 0.008 |
| 167 | Q13451 | Peptidyl-prolyl cis-trans isomerase FKBP5                | 6.3 ± 2.1   | 6.67   | 21.74 | 1.8  | 0.050 |
| 168 | Q8WUA2 | Peptidyl-prolyl cis-trans isomerase-like 4               | 2.3 ± 1.5   | 2.33   | 7.18  | 1.2  | 0.035 |
| 169 | P32119 | Peroxiredoxin-2                                          | 6.0 ± 2.0   | 11.67  | 34.34 | -2.1 | 0.029 |
| 170 | P30044 | Peroxiredoxin-5, mitochondrial                           | 9.0 ± 0.0   | 17.00  | 47.20 | 1.6  | 0.018 |
| 171 | P51659 | Peroxisomal multifunctional enzyme type 2                | 17.3 ± 1.5  | 22.00  | 35.37 | 2.0  | 0.043 |
| 172 | Q00325 | Phosphate carrier protein, mitochondrial                 | 3.0 ± 0.0   | 4.00   | 10.22 | -1.4 | 0.025 |
| 173 | Q9NTJ5 | Phosphatidylinositide phosphatase SAC1                   | 4.0 ± 1.7   | 5.00   | 10.45 | -1.8 | 0.004 |
| 174 | Q92835 | Phosphatidylinositol 3,4,5-trisphosphate 5-phosphatase 1 | 14.3 ± 6.7  | 17.33  | 17.30 | -1.4 | 0.037 |
| 175 | P48426 | Phosphatidylinositol 5-phosphate 4-kinase type-2 alpha   | 5.0 ± 1.0   | 6.00   | 16.42 | -2.2 | 0.002 |
| 176 | Q6P4A8 | Phospholipase B-like 1                                   | 2.0 ± 0.0   | 2.00   | 2.80  | -1.5 | 0.008 |

|     |        |                                                                  |            |       |       |      |       |
|-----|--------|------------------------------------------------------------------|------------|-------|-------|------|-------|
| 177 | P36969 | Phospholipid hydroperoxide glutathione peroxidase, mitochondrial | 1.7 ± 0.6  | 1.67  | 10.83 | -1.1 | 0.031 |
| 178 | O60256 | Phosphoribosyl pyrophosphate synthase-associated protein 2       | 9.7 ± 2.1  | 12.33 | 39.21 | -1.4 | 0.047 |
| 179 | Q8WU39 | Plasma cell-induced resident endoplasmic reticulum protein       | 2.7 ± 0.6  | 3.33  | 24.16 | 3.4  | 0.024 |
| 180 | P02776 | Platelet factor 4                                                | 3.3 ± 1.5  | 6.00  | 40.59 | -3.4 | 0.050 |
| 181 | Q9H8W4 | Pleckstrin homology domain-containing family F member 2          | 2.7 ± 0.6  | 2.67  | 16.47 | -1.7 | 0.046 |
| 182 | Q86U42 | Polyadenylate-binding protein 2                                  | 4.7 ± 1.5  | 7.00  | 25.71 | 1.5  | 0.007 |
| 183 | O95758 | Polypyrimidine tract-binding protein 3***                        | 1          | 3.00  | 6.88  | -1.2 | 0.038 |
| 184 | O75934 | Pre-mRNA-splicing factor SPF27                                   | 3.3 ± 1.5  | 3.67  | 21.04 | 1.6  | 0.001 |
| 185 | Q15007 | Pre-mRNA-splicing regulator WTAP                                 | 1.5 ± 0.7  | 3.00  | 7.45  | 1.3  | 0.049 |
| 186 | Q8NDH3 | Probable aminopeptidase NPEPL1                                   | 1.3 ± 0.6  | 1.33  | 3.95  | 3.3  | 0.029 |
| 187 | Q8IY21 | Probable ATP-dependent RNA helicase DDX60                        | 1.7 ± 1.2  | 2.33  | 1.44  | -1.5 | 0.023 |
| 188 | Q8WUM4 | Programmed cell death 6-interacting protein                      | 11.7 ± 2.1 | 14.67 | 20.70 | -1.7 | 0.040 |
| 189 | O75340 | Programmed cell death protein 6                                  | 4.7 ± 0.6  | 5.67  | 34.21 | -1.1 | 0.044 |
| 190 | Q9HCU5 | Prolactin regulatory element-binding protein                     | 4.7 ± 1.5  | 4.67  | 21.42 | 1.4  | 0.013 |
| 191 | Q01658 | Protein Dr1*                                                     | 1.0 ± 0.0  | 1.00  | 7.39  | 1.4  | 0.002 |
| 192 | Q52LJ0 | Protein FAM98B                                                   | 9.7 ± 1.5  | 15.67 | 43.94 | 1.3  | 0.029 |
| 193 | O94992 | Protein HEXIM1                                                   | 2.0 ± 1.0  | 2.67  | 6.31  | -1.1 | 0.034 |
| 194 | Q9Y316 | Protein MEMO1                                                    | 1.0 ± 0.0  | 1.00  | 5.05  | -1.4 | 0.028 |
| 195 | P29590 | Protein PML                                                      | 13.7 ± 4.2 | 17.00 | 21.24 | 1.5  | 0.030 |
| 196 | Q96PU8 | Protein quaking                                                  | 2.0 ± 0.0  | 2.00  | 8.21  | 1.8  | 0.040 |
| 197 | P05109 | Protein S100-A8                                                  | 2.3 ± 1.5  | 3.33  | 24.73 | -6.3 | 0.001 |
| 198 | P06702 | Protein S100-A9                                                  | 4.3 ± 3.1  | 7.67  | 47.66 | -6.4 | 0.000 |
| 199 | Q92734 | Protein TFG                                                      | 3.7 ± 0.6  | 4.33  | 12.83 | 1.4  | 0.022 |
| 200 | O94979 | Protein transport protein Sec31A                                 | 7.3 ± 1.2  | 10.33 | 9.97  | 1.4  | 0.022 |
| 201 | Q14289 | Protein-tyrosine kinase 2-beta                                   | 3.0 ± 1.7  | 3.33  | 5.05  | -1.4 | 0.038 |
| 202 | P0CB46 | Putative caspase-16***                                           | 1          | 2.00  | 4.37  | 1.3  | 0.038 |

|     |        |                                                              |            |       |       |      |       |
|-----|--------|--------------------------------------------------------------|------------|-------|-------|------|-------|
| 203 | Q7Z7A4 | PX domain-containing protein kinase-like protein**           | 1          | 1.00  | 3.63  | -2.7 | 0.042 |
| 204 | Q96GD0 | Pyridoxal phosphate phosphatase                              | 1.3 ± 0.6  | 1.33  | 6.08  | -1.4 | 0.014 |
| 205 | Q6K0P9 | Pyrin and HIN domain-containing protein 1                    | 5.7 ± 2.9  | 6.67  | 15.92 | -3.0 | 0.009 |
| 206 | Q9BXR0 | Queuine tRNA-ribosyltransferase***                           | 2          | 2.00  | 6.70  | 1.3  | 0.017 |
| 207 | P50395 | Rab GDP dissociation inhibitor beta                          | 28.7 ± 2.3 | 45.00 | 69.06 | -2.1 | 0.009 |
| 208 | Q5R372 | Rab GTPase-activating protein 1-like                         | 3.0 ± 2.0  | 3.33  | 4.99  | 1.6  | 0.032 |
| 209 | Q7LDG7 | RAS guanyl-releasing protein 2                               | 2.7 ± 0.6  | 3.33  | 8.10  | -2.2 | 0.006 |
| 210 | P61224 | Ras-related protein Rap-1b                                   | 9.0 ± 1.7  | 13.33 | 59.96 | -1.5 | 0.010 |
| 211 | P08575 | Receptor-type tyrosine-protein phosphatase C                 | 35.3 ± 3.5 | 53.67 | 30.50 | -1.7 | 0.009 |
| 212 | P40937 | Replication factor C subunit 5                               | 1.7 ± 1.2  | 2.00  | 7.26  | -1.2 | 0.025 |
| 213 | Q8N264 | Rho GTPase-activating protein 24                             | 3.0 ± 0.0  | 3.67  | 5.84  | 1.3  | 0.010 |
| 214 | Q92888 | Rho guanine nucleotide exchange factor 1                     | 12.0 ± 1.0 | 12.00 | 16.78 | -1.5 | 0.049 |
| 215 | P13489 | Ribonuclease inhibitor                                       | 16.0 ± 2.0 | 32.67 | 50.25 | 1.5  | 0.030 |
| 216 | P51812 | Ribosomal protein S6 kinase alpha-3                          | 5.3 ± 1.5  | 5.67  | 10.09 | -1.5 | 0.006 |
| 217 | Q9Y3A5 | Ribosome maturation protein SBDS                             | 2.0 ± 1.0  | 2.00  | 8.80  | -1.3 | 0.034 |
| 218 | Q9P2E9 | Ribosome-binding protein 1                                   | 20.0 ± 1.7 | 22.67 | 23.88 | 3.1  | 0.000 |
| 219 | Q9P2N5 | RNA-binding protein 27                                       | 2.7 ± 1.5  | 3.67  | 3.84  | -1.4 | 0.041 |
| 220 | Q14498 | RNA-binding protein 39                                       | 10.0 ± 1.7 | 12.00 | 26.98 | 1.3  | 0.012 |
| 221 | Q9BWF3 | RNA-binding protein 4                                        | 3.3 ± 2.3  | 4.33  | 18.68 | 1.1  | 0.044 |
| 222 | Q9Y5S9 | RNA-binding protein 8A                                       | 7.7 ± 1.5  | 13.00 | 57.66 | 1.3  | 0.006 |
| 223 | Q01844 | RNA-binding protein EWS                                      | 7.7 ± 1.2  | 15.00 | 15.80 | 1.4  | 0.011 |
| 224 | Q6PCB5 | Round spermatid basic protein 1-like protein*                | 1          | 1.00  | 2.01  | 1.2  | 0.038 |
| 225 | Q9Y3Z3 | SAM domain and HD domain-containing protein 1                | 5.3 ± 2.3  | 7.00  | 12.89 | -3.6 | 0.001 |
| 226 | Q13243 | Serine/arginine-rich splicing factor 5                       | 5.3 ± 0.6  | 6.33  | 23.29 | 1.3  | 0.025 |
| 227 | Q8TD19 | Serine/threonine-protein kinase Nek9                         | 3.3 ± 0.6  | 3.67  | 4.66  | -1.2 | 0.034 |
| 228 | Q96QC0 | Serine/threonine-protein phosphatase 1 regulatory subunit 10 | 4.0 ± 2.0  | 5.00  | 7.06  | 1.4  | 0.028 |
| 229 | P60510 | Serine/threonine-protein phosphatase 4                       | 4.7 ± 1.5  | 5.33  | 24.11 | 1.4  | 0.020 |

|     |        |                                                                                               |            |        |       |      |       |
|-----|--------|-----------------------------------------------------------------------------------------------|------------|--------|-------|------|-------|
|     |        | catalytic subunit                                                                             |            |        |       |      |       |
| 230 | Q96HS1 | Serine/threonine-protein phosphatase PGAM5, mitochondrial                                     | 3.0 ± 0.0  | 3.00   | 9.69  | -1.5 | 0.018 |
| 231 | P50454 | Serpin H1                                                                                     | 4.0 ± 2.0  | 4.00   | 17.15 | 1.6  | 0.007 |
| 232 | Q9BXP5 | Serrate RNA effector molecule homolog                                                         | 13.7 ± 3.1 | 16.67  | 20.93 | 1.3  | 0.029 |
| 233 | P67812 | Signal peptidase complex catalytic subunit SEC11A                                             | 2.0 ± 1.0  | 2.33   | 10.80 | 1.5  | 0.021 |
| 234 | P37108 | Signal recognition particle 14 kDa protein                                                    | 4.7 ± 1.5  | 7.00   | 35.54 | 1.7  | 0.005 |
| 235 | P49458 | Signal recognition particle 9 kDa protein                                                     | 4.3 ± 1.5  | 8.00   | 50.78 | 1.8  | 0.018 |
| 236 | P42229 | Signal transducer and activator of transcription 5A                                           | 5.3 ± 2.1  | 5.67   | 7.81  | -1.9 | 0.028 |
| 237 | O43166 | Signal-induced proliferation-associated 1-like protein 1                                      | 1.5 ± 0.7  | 1.50   | 1.00  | -1.3 | 0.004 |
| 238 | P62316 | Small nuclear ribonucleoprotein Sm D2                                                         | 5.0 ± 1.7  | 12.67  | 43.50 | 1.3  | 0.039 |
| 239 | P30626 | Sorcin                                                                                        | 6.3 ± 1.5  | 9.67   | 38.05 | 1.5  | 0.013 |
| 240 | P23246 | Splicing factor, proline- and glutamine-rich                                                  | 22.3 ± 5.7 | 41.00  | 33.29 | 1.7  | 0.003 |
| 241 | Q9UBE0 | SUMO-activating enzyme subunit 1                                                              | 9.0 ± 0.0  | 12.67  | 36.61 | 1.5  | 0.010 |
| 242 | Q969G3 | SWI/SNF-related matrix-associated actin-dependent regulator of chromatin subfamily E member 1 | 5.7 ± 3.2  | 8.33   | 22.06 | 1.5  | 0.039 |
| 243 | O43760 | Synaptogyrin-2                                                                                | 2.0 ± 0.0  | 2.33   | 8.93  | -1.2 | 0.019 |
| 244 | O95721 | Synaptosomal-associated protein 29                                                            | 2.3 ± 1.5  | 2.67   | 11.50 | 1.3  | 0.020 |
| 245 | Q15833 | Syntaxin-binding protein 2                                                                    | 3.0 ± 1.0  | 3.00   | 8.82  | -1.2 | 0.030 |
| 246 | O00186 | Syntaxin-binding protein 3                                                                    | 4.0 ± 0.0  | 4.00   | 6.67  | -1.3 | 0.047 |
| 247 | Q9Y490 | Talin-1                                                                                       | 76.3 ± 8.7 | 143.00 | 46.14 | -3.5 | 0.015 |
| 248 | P56279 | T-cell leukemia/lymphoma protein 1A                                                           | 5.0 ± 1.7  | 6.33   | 47.37 | 2.9  | 0.004 |
| 249 | Q99832 | T-complex protein 1 subunit eta                                                               | 12.7 ± 2.3 | 15.33  | 34.25 | -1.5 | 0.041 |
| 250 | O95801 | Tetratricopeptide repeat protein 4***                                                         | 1          | 2.00   | 7.24  | -1.3 | 0.048 |
| 251 | Q8NBS9 | Thioredoxin domain-containing protein 5                                                       | 20.0 ± 4.6 | 34.00  | 48.77 | 3.2  | 0.007 |
| 252 | Q6I9Y2 | THO complex subunit 7 homolog                                                                 | 1.3 ± 0.6  | 1.33   | 7.03  | 1.6  | 0.037 |
| 253 | P07996 | Thrombospondin-1                                                                              | 9.7 ± 6.7  | 12.00  | 11.17 | -5.2 | 0.017 |

|     |        |                                                   |            |       |       |      |       |
|-----|--------|---------------------------------------------------|------------|-------|-------|------|-------|
| 254 | Q9Y2W1 | Thyroid hormone receptor-associated protein 3     | 11.3 ± 0.6 | 13.33 | 15.04 | 1.7  | 0.008 |
| 255 | P52655 | Transcription initiation factor IIA subunit 1     | 2.0 ± 0.0  | 3.00  | 7.45  | 1.2  | 0.040 |
| 256 | Q13263 | Transcription intermediary factor 1-beta          | 21.7 ± 4.0 | 36.67 | 35.57 | 1.5  | 0.012 |
| 257 | Q92973 | Transportin-1                                     | 3.3 ± 1.2  | 3.33  | 5.16  | -2.2 | 0.029 |
| 258 | Q96G46 | tRNA-dihydrouridine(47) synthase [NAD(P)(+)]-like | 2.7 ± 1.2  | 2.67  | 7.33  | -1.3 | 0.036 |
| 259 | Q9NYL9 | Tropomodulin-3                                    | 5.3 ± 3.1  | 5.67  | 26.61 | -1.5 | 0.026 |
| 260 | P55327 | Tumor protein D52                                 | 4.3 ± 1.5  | 7.00  | 27.08 | -3.9 | 0.000 |
| 261 | P41240 | Tyrosine-protein kinase CSK                       | 13.0 ± 2.6 | 20.00 | 35.19 | -1.5 | 0.050 |
| 262 | P29350 | Tyrosine-protein phosphatase non-receptor type 6  | 24.0 ± 6.2 | 40.00 | 50.81 | -2.6 | 0.001 |
| 263 | P08621 | U1 small nuclear ribonucleoprotein 70 kDa         | 5.3 ± 2.1  | 6.67  | 16.85 | 1.2  | 0.029 |
| 264 | Q13107 | Ubiquitin carboxyl-terminal hydrolase 4           | 3.0 ± 1.7  | 3.67  | 4.60  | -1.3 | 0.047 |
| 265 | O94888 | UBX domain-containing protein 7                   | 3.3 ± 1.5  | 4.00  | 9.88  | 1.3  | 0.049 |
| 266 | Q9NYU2 | UDP-glucose:glycoprotein glucosyltransferase 1    | 19.3 ± 3.2 | 23.00 | 17.45 | -1.6 | 0.010 |
| 267 | Q9BQA9 | Uncharacterized protein C17orf62***               | 2.0 ± 1.4  | 3.50  | 11.23 | -1.6 | 0.032 |
| 268 | Q6ICL3 | Uncharacterized protein C22orf25*                 | 1.0 ± 0.0  | 1.00  | 6.88  | -1.6 | 0.031 |
| 269 | Q86YS7 | Uncharacterized protein KIAA0528**                | 1          | 1.00  | 2.00  | 1.9  | 0.046 |
| 270 | P54727 | UV excision repair protein RAD23 homolog B        | 7.7 ± 2.1  | 12.67 | 24.04 | 1.4  | 0.029 |
| 271 | Q709C8 | Vacuolar protein sorting-associated protein 13C   | 20.7 ± 4.2 | 21.67 | 7.72  | -1.4 | 0.014 |
| 272 | O75351 | Vacuolar protein sorting-associated protein 4B    | 6.3 ± 0.6  | 7.00  | 20.42 | -1.4 | 0.026 |
| 273 | P50552 | Vasodilator-stimulated phosphoprotein             | 7.3 ± 2.1  | 8.67  | 24.91 | -1.8 | 0.050 |
| 274 | P49750 | YLP motif-containing protein 1                    | 9.0 ± 5.0  | 10.00 | 6.25  | 1.2  | 0.002 |

All proteins identified by ≥2 peptides at ≥90% confidence and present in ≥2 iTRAQ experiments unless stated.

- \* Proteins identified by a single peptide (≥99% confidence) in ≥2 iTRAQ experiments
- \*\* Proteins identified by a single peptide (≥99% confidence) in a single iTRAQ experiment
- \*\*\* Proteins identified by ≥2 peptides (≥90% confidence) in a single iTRAQ experiment
- † See also P04206, P01623, P01620, P18136, P18135

**Supplementary Table S3. List of 169 signalling pathways which were significantly enriched ( $P<0.05$ ) by the GeneGo Pathway Maps in the Metacore database using 274 proteins that were significantly differentially expressed between UM-CLL and M-CLL ( $P<0.05$ )**

|    | Enriched pathway map                                                                              | <i>P</i> value | FDR  | No. of diff exp. proteins in pathway | Total proteins in pathway |
|----|---------------------------------------------------------------------------------------------------|----------------|------|--------------------------------------|---------------------------|
| 1  | Cytoskeleton remodeling_Regulation of actin cytoskeleton by Rho GTPases                           | <0.001         | 0.00 | 7                                    | 23                        |
| 2  | Blood coagulation_GPCRs in platelet aggregation                                                   | <0.001         | 0.00 | 10                                   | 71                        |
| 3  | Chemotaxis_Inhibitory action of lipoxins on IL-8- and Leukotriene B4-induced neutrophil migration | <0.001         | 0.00 | 8                                    | 51                        |
| 4  | Inhibitory action of Lipoxins on neutrophil migration                                             | <0.001         | 0.00 | 8                                    | 57                        |
| 5  | Cell adhesion_Chemokines and adhesion                                                             | <0.001         | 0.00 | 10                                   | 100                       |
| 6  | wtCFTR and delta508 traffic / Clathrin coated vesicles formation (norm and CF)                    | <0.001         | 0.00 | 5                                    | 19                        |
| 7  | Cell adhesion_IL-8-dependent cell migration and adhesion                                          | <0.001         | 0.00 | 6                                    | 33                        |
| 8  | Transport_Clathrin-coated vesicle cycle                                                           | <0.001         | 0.00 | 8                                    | 71                        |
| 9  | Chemotaxis_Leukocyte chemotaxis                                                                   | <0.001         | 0.00 | 8                                    | 75                        |
| 10 | Blood coagulation_GPIb-IX-V-dependent platelet activation                                         | <0.001         | 0.00 | 8                                    | 76                        |
| 11 | Immune response_Immunological synapse formation                                                   | <0.001         | 0.00 | 7                                    | 59                        |
| 12 | Cell adhesion_Histamine H1 receptor signaling in the interruption of cell barrier integrity       | <0.001         | 0.00 | 6                                    | 45                        |
| 13 | Development_G-CSF-induced myeloid differentiation                                                 | <0.001         | 0.00 | 5                                    | 30                        |
| 14 | Cytoskeleton remodeling_Integrin outside-in signaling                                             | <0.001         | 0.00 | 6                                    | 49                        |
| 15 | Cytoskeleton remodeling_Cytoskeleton remodeling                                                   | <0.001         | 0.00 | 8                                    | 102                       |
| 16 | LRRK2 in neurons in Parkinson's disease                                                           | <0.001         | 0.00 | 5                                    | 33                        |
| 17 | Immune response_CCR3 signaling in eosinophils                                                     | <0.001         | 0.00 | 7                                    | 77                        |
| 18 | CCR4-dependent immune cell chemotaxis in asthma and atopic dermatitis                             | <0.001         | 0.00 | 5                                    | 34                        |
| 19 | Development_S1P1 receptor signaling via beta-arrestin                                             | <0.001         | 0.00 | 5                                    | 34                        |
| 20 | Chemotaxis_CCR4-induced chemotaxis of immune cells                                                | <0.001         | 0.00 | 5                                    | 34                        |
| 21 | Mechanism of action of CCR4 antagonists in asthma and atopic dermatitis (Variant 1)               | <0.001         | 0.00 | 5                                    | 34                        |
| 22 | Immune response_CXCR4 signaling via second messenger                                              | <0.001         | 0.00 | 5                                    | 34                        |
| 23 | Airway smooth muscle contraction in asthma                                                        | <0.001         | 0.00 | 6                                    | 56                        |
| 24 | Gamma-secretase regulation of osteogenesis                                                        | <0.001         | 0.00 | 5                                    | 37                        |
| 25 | Development_MAG-dependent inhibition of neurite outgrowth                                         | <0.001         | 0.00 | 5                                    | 37                        |
| 26 | Immune response_Role of integrins in NK cells cytotoxicity                                        | <0.001         | 0.00 | 5                                    | 38                        |
| 27 | Transcription_Sin3 and NuRD in transcription regulation                                           | <0.001         | 0.00 | 5                                    | 38                        |

|    |                                                                                   |        |      |   |     |
|----|-----------------------------------------------------------------------------------|--------|------|---|-----|
| 28 | Immune response_Neutrotensin-induced activation of IL-8 in colonocytes            | <0.001 | 0.00 | 5 | 42  |
| 29 | Chemotaxis_C5a-induced chemotaxis                                                 | <0.001 | 0.00 | 5 | 43  |
| 30 | Development_Mu-type opioid receptor signaling via Beta-arrestin                   | <0.001 | 0.00 | 4 | 24  |
| 31 | Immune response_MIF-induced cell adhesion, migration and angiogenesis             | <0.001 | 0.01 | 5 | 46  |
| 32 | Chemotaxis_Lipoxin inhibitory action on fMLP-induced neutrophil chemotaxis        | <0.001 | 0.01 | 5 | 46  |
| 33 | Muscle contraction_Delta-type opioid receptor in smooth muscle contraction        | <0.001 | 0.01 | 4 | 26  |
| 34 | Development_S1P2 and S1P3 receptors in cell proliferation and differentiation     | <0.001 | 0.01 | 4 | 26  |
| 35 | Cell adhesion_Integrin-mediated cell adhesion and migration                       | <0.001 | 0.01 | 5 | 48  |
| 36 | Development_Thromboxane A2 pathway signaling                                      | 0.001  | 0.01 | 5 | 49  |
| 37 | Immune response_IL-2 activation and signaling pathway                             | 0.001  | 0.01 | 5 | 49  |
| 38 | Immune response_Signaling pathway mediated by IL-6 and IL-1                       | 0.001  | 0.01 | 4 | 30  |
| 39 | Cytoskeleton remodeling_TGF, WNT and cytoskeletal remodeling                      | 0.001  | 0.01 | 7 | 111 |
| 40 | Immune response_IL-3 activation and signaling pathway                             | 0.001  | 0.01 | 4 | 31  |
| 41 | Immune response_CCL2 signaling                                                    | 0.001  | 0.01 | 5 | 54  |
| 42 | CFTR folding and maturation (norm and CF)                                         | 0.001  | 0.01 | 3 | 14  |
| 43 | Development_Transcription regulation of granulocyte development                   | 0.001  | 0.01 | 4 | 32  |
| 44 | Muscle contraction_GPCRs in the regulation of smooth muscle tone                  | 0.001  | 0.01 | 6 | 83  |
| 45 | Cell adhesion_Integrin inside-out signaling                                       | 0.001  | 0.01 | 5 | 56  |
| 46 | Chemotaxis_CXCR4 signaling pathway                                                | 0.001  | 0.01 | 4 | 34  |
| 47 | Development_EPO-induced Jak-STAT pathway                                          | 0.001  | 0.01 | 4 | 35  |
| 48 | Immune response_Regulation of T cell function by CTLA-4                           | 0.001  | 0.01 | 4 | 36  |
| 49 | Development_c-Kit ligand signaling pathway during hemopoiesis                     | 0.001  | 0.01 | 5 | 61  |
| 50 | Cell adhesion_Role of tetraspanins in the integrin-mediated cell adhesion         | 0.002  | 0.02 | 4 | 37  |
| 51 | Transcription_NF-kB signaling pathway                                             | 0.002  | 0.02 | 4 | 39  |
| 52 | Cytoskeleton remodeling_Alpha-1A adrenergic receptor-dependent inhibition of PI3K | 0.002  | 0.02 | 3 | 19  |
| 53 | Cytoskeleton remodeling_Role of PKA in cytoskeleton reorganisation                | 0.002  | 0.02 | 4 | 40  |
| 54 | Immune response_CD16 signaling in NK cells                                        | 0.002  | 0.02 | 5 | 69  |
| 55 | Apoptosis and survival_Anti-apoptotic TNFs/NF-kB/Bcl-2 pathway                    | 0.002  | 0.02 | 4 | 42  |
| 56 | Apoptosis and survival_Lymphotoxin-beta receptor signaling                        | 0.002  | 0.02 | 4 | 42  |
| 57 | Glutathione metabolism / Rodent version                                           | 0.003  | 0.02 | 5 | 70  |
| 58 | Development_ACM2 and ACM4 activation of ERK                                       | 0.003  | 0.02 | 4 | 43  |
| 59 | Apoptosis and survival_TNFR1 signaling pathway                                    | 0.003  | 0.02 | 4 | 43  |
| 60 | Development_S1P3 receptor signaling pathway                                       | 0.003  | 0.02 | 4 | 43  |
| 61 | Development_Flt3 signaling                                                        | 0.003  | 0.02 | 4 | 44  |

|    |                                                                         |       |      |   |    |
|----|-------------------------------------------------------------------------|-------|------|---|----|
| 62 | Immune response_IL-5 signalling                                         | 0.003 | 0.02 | 4 | 44 |
| 63 | LRRK2 and immune function in Parkinson's disease                        | 0.003 | 0.03 | 3 | 22 |
| 64 | Immune response_Fc gamma R-mediated phagocytosis in macrophages         | 0.003 | 0.03 | 4 | 46 |
| 65 | Regulation of metabolism_Triiodothyronine and Thyroxine signaling       | 0.004 | 0.03 | 4 | 48 |
| 66 | Muscle contraction_Relaxin signaling pathway                            | 0.004 | 0.03 | 4 | 48 |
| 67 | Development_Glucocorticoid receptor signaling                           | 0.004 | 0.03 | 3 | 24 |
| 68 | Development_GDNF signaling                                              | 0.004 | 0.03 | 3 | 24 |
| 69 | Development_A3 receptor signaling                                       | 0.004 | 0.03 | 4 | 49 |
| 70 | Development_GM-CSF signaling                                            | 0.005 | 0.03 | 4 | 50 |
| 71 | Development_EDNRB signaling                                             | 0.005 | 0.03 | 4 | 50 |
| 72 | Immune response_C5a signaling                                           | 0.005 | 0.03 | 4 | 50 |
| 73 | Development_TGF-beta receptor signaling                                 | 0.005 | 0.03 | 4 | 50 |
| 74 | Signal transduction_Activation of PKC via G-Protein coupled receptor    | 0.005 | 0.04 | 4 | 52 |
| 75 | G-protein signaling_Proinsulin C-peptide signaling                      | 0.005 | 0.04 | 4 | 52 |
| 76 | Development_VEGF signaling via VEGFR2 - generic cascades                | 0.006 | 0.04 | 5 | 84 |
| 77 | Development_A1 receptor signaling                                       | 0.006 | 0.04 | 4 | 53 |
| 78 | Immune response_T cell receptor signaling pathway                       | 0.006 | 0.04 | 4 | 53 |
| 79 | Development_WNT signaling pathway. Part 2                               | 0.006 | 0.04 | 4 | 53 |
| 80 | Immune response_BCR pathway                                             | 0.006 | 0.04 | 4 | 54 |
| 81 | Blood coagulation_GPVI-dependent platelet activation                    | 0.007 | 0.04 | 4 | 55 |
| 82 | Proteolysis_Putative SUMO-1 pathway                                     | 0.007 | 0.04 | 3 | 29 |
| 83 | Chemotaxis_CCL2-induced chemotaxis                                      | 0.007 | 0.04 | 4 | 56 |
| 84 | Muscle contraction_S1P2 receptor-mediated smooth muscle contraction     | 0.008 | 0.04 | 3 | 30 |
| 85 | Apoptosis and survival_Granzyme A signaling                             | 0.008 | 0.04 | 3 | 30 |
| 86 | Development_Osteopontin signaling in osteoclasts                        | 0.008 | 0.04 | 3 | 30 |
| 87 | Cytoskeleton remodeling_RalA regulation pathway                         | 0.008 | 0.04 | 3 | 30 |
| 88 | Immune response_CCR5 signaling in macrophages and T lymphocytes         | 0.008 | 0.04 | 4 | 58 |
| 89 | Regulation of CFTR activity (norm and CF)                               | 0.008 | 0.04 | 4 | 58 |
| 90 | Immune response_ETV3 affect on CSF1-promoted macrophage differentiation | 0.008 | 0.05 | 3 | 31 |
| 91 | Cytoskeleton remodeling_Reverse signaling by ephrin B                   | 0.008 | 0.05 | 3 | 31 |
| 92 | Development_Alpha-2 adrenergic receptor activation of ERK               | 0.010 | 0.05 | 4 | 62 |
| 93 | Development_Angiotensin activation of ERK                               | 0.010 | 0.05 | 3 | 33 |
| 94 | Cell adhesion_Alpha-4 integrins in cell migration and adhesion          | 0.011 | 0.06 | 3 | 34 |
| 95 | Development_NOTCH1-mediated pathway for NF-KB activity modulation       | 0.011 | 0.06 | 3 | 34 |



|     |                                                                                            |       |      |   |    |
|-----|--------------------------------------------------------------------------------------------|-------|------|---|----|
| 96  | Immune response_Sialic-acid receptors (Siglecs) signaling                                  | 0.011 | 0.06 | 2 | 12 |
| 97  | Transport_Macropinocytosis                                                                 | 0.011 | 0.06 | 2 | 12 |
| 98  | Glutathione metabolism                                                                     | 0.011 | 0.06 | 4 | 64 |
| 99  | Glutathione metabolism / Human version                                                     | 0.012 | 0.06 | 4 | 65 |
| 100 | G-protein signaling_S1P2 receptor signaling                                                | 0.012 | 0.06 | 3 | 35 |
| 101 | Development_SSTR2 in regulation of cell proliferation                                      | 0.013 | 0.06 | 3 | 36 |
| 102 | Development_Activation of ERK by Kappa-type opioid receptor                                | 0.013 | 0.06 | 3 | 36 |
| 103 | Cell adhesion_Tight junctions                                                              | 0.013 | 0.06 | 3 | 36 |
| 104 | Delta508-CFTR traffic / ER-to-Golgi in CF                                                  | 0.013 | 0.06 | 2 | 13 |
| 105 | Normal wtCFTR traffic / ER-to-Golgi                                                        | 0.013 | 0.06 | 2 | 13 |
| 106 | Development_Beta-adrenergic receptors transactivation of EGFR                              | 0.014 | 0.06 | 3 | 37 |
| 107 | Immune response_IL-7 signaling in T lymphocytes                                            | 0.015 | 0.07 | 3 | 38 |
| 108 | Apoptosis and survival_APRIL and BAFF signaling                                            | 0.016 | 0.07 | 3 | 39 |
| 109 | Development_PACAP signaling in neural cells                                                | 0.016 | 0.07 | 3 | 39 |
| 110 | G-protein signaling_Regulation of p38 and JNK signaling mediated by G-proteins             | 0.016 | 0.07 | 3 | 39 |
| 111 | Regulation of lipid metabolism_Stimulation of Arachidonic acid production by ACM receptors | 0.017 | 0.08 | 4 | 72 |
| 112 | Neurophysiological process_ACM1 and ACM2 in neuronal membrane polarization                 | 0.017 | 0.08 | 3 | 40 |
| 113 | Reproduction_Progesterone-mediated oocyte maturation                                       | 0.017 | 0.08 | 3 | 40 |
| 114 | Immune response_PIP3 signaling in B lymphocytes                                            | 0.019 | 0.08 | 3 | 42 |
| 115 | Development_Growth hormone signaling via PI3K/AKT and MAPK cascades                        | 0.019 | 0.08 | 3 | 42 |
| 116 | Gamma-secretase proteolytic targets                                                        | 0.020 | 0.09 | 4 | 76 |
| 117 | Immune response_IL-7 signaling in B lymphocytes                                            | 0.021 | 0.09 | 3 | 43 |
| 118 | Immune response_HTR2A-induced activation of cPLA2                                          | 0.021 | 0.09 | 3 | 43 |
| 119 | Apoptosis and survival_TNF-alpha-induced Caspase-8 signaling                               | 0.021 | 0.09 | 3 | 43 |
| 120 | Development_A2A receptor signaling                                                         | 0.021 | 0.09 | 3 | 43 |
| 121 | Development_VEGF signaling and activation                                                  | 0.021 | 0.09 | 3 | 43 |
| 122 | Immune response_IL-4 signaling pathway                                                     | 0.022 | 0.09 | 3 | 44 |
| 123 | Development_Activation of Erk by ACM1, ACM3 and ACM5                                       | 0.022 | 0.09 | 3 | 44 |
| 124 | Development_S1P1 signaling pathway                                                         | 0.022 | 0.09 | 3 | 44 |
| 125 | DNA damage_Role of SUMO in p53 regulation                                                  | 0.022 | 0.09 | 2 | 17 |
| 126 | Transcription_Androgen Receptor nuclear signaling                                          | 0.023 | 0.09 | 3 | 45 |
| 127 | Development_G-Proteins mediated regulation MAPK-ERK signaling                              | 0.025 | 0.10 | 3 | 46 |
| 128 | Development_GDNF family signaling                                                          | 0.025 | 0.10 | 3 | 46 |
| 129 | Development_Endothelin-1/EDNRA transactivation of EGFR                                     | 0.025 | 0.10 | 3 | 46 |

|     |                                                                                |       |      |   |    |
|-----|--------------------------------------------------------------------------------|-------|------|---|----|
| 130 | Transport_Alpha-2 adrenergic receptor regulation of ion channels               | 0.026 | 0.10 | 3 | 47 |
| 131 | Development_Beta-adrenergic receptors regulation of ERK                        | 0.026 | 0.10 | 3 | 47 |
| 132 | DNA damage_NHEJ mechanisms of DSBs repair                                      | 0.027 | 0.10 | 2 | 19 |
| 133 | Development_G-CSF signaling                                                    | 0.029 | 0.11 | 3 | 49 |
| 134 | Apoptosis and survival_HTR1A signaling                                         | 0.031 | 0.11 | 3 | 50 |
| 135 | Mucin expression in CF via TLRs, EGFR signaling pathways                       | 0.031 | 0.11 | 3 | 50 |
| 136 | wtCFTR and delta508-CFTR traffic / Generic schema (norm and CF)                | 0.031 | 0.11 | 3 | 50 |
| 137 | Development_A2B receptor: action via G-protein alpha s                         | 0.031 | 0.11 | 3 | 50 |
| 138 | Cell cycle_Chromosome condensation in prometaphase                             | 0.033 | 0.12 | 2 | 21 |
| 139 | Development_IGF-1 receptor signaling                                           | 0.034 | 0.12 | 3 | 52 |
| 140 | Apoptosis and survival_Endoplasmic reticulum stress response pathway           | 0.035 | 0.12 | 3 | 53 |
| 141 | Development_Endothelin-1/EDNRA signaling                                       | 0.035 | 0.12 | 3 | 53 |
| 142 | Immune response_HMGB1/RAGE signaling pathway                                   | 0.035 | 0.12 | 3 | 53 |
| 143 | Development_S1P4 receptor signaling pathway                                    | 0.036 | 0.12 | 2 | 22 |
| 144 | Cell cycle_Sister chromatid cohesion                                           | 0.036 | 0.12 | 2 | 22 |
| 145 | Amitraz-induced inhibition of Insulin secretion                                | 0.036 | 0.12 | 2 | 22 |
| 146 | Development_Thrombopoetin signaling via JAK-STAT pathway                       | 0.036 | 0.12 | 2 | 22 |
| 147 | Immune response_Role of DAP12 receptors in NK cells                            | 0.037 | 0.12 | 3 | 54 |
| 148 | Immune response_HSP60 and HSP70/ TLR signaling pathway                         | 0.037 | 0.12 | 3 | 54 |
| 149 | NRF2 regulation of oxidative stress response                                   | 0.037 | 0.12 | 3 | 54 |
| 150 | Immune response_IL-12 signaling pathway                                        | 0.039 | 0.13 | 2 | 23 |
| 151 | Immune response_IL-15 signaling via JAK-STAT cascade                           | 0.039 | 0.13 | 2 | 23 |
| 152 | Delta508-CFTR traffic / Sorting endosome formation in CF                       | 0.039 | 0.13 | 2 | 23 |
| 153 | Development_Delta- and kappa-type opioid receptors signaling via beta-arrestin | 0.039 | 0.13 | 2 | 23 |
| 154 | PGE2 pathways in cancer                                                        | 0.039 | 0.13 | 3 | 55 |
| 155 | Immune response_Fc epsilon RI pathway                                          | 0.039 | 0.13 | 3 | 55 |
| 156 | Immune response_IFN alpha/beta signaling pathway                               | 0.042 | 0.13 | 2 | 24 |
| 157 | Immune response_IL-27 signaling pathway                                        | 0.042 | 0.13 | 2 | 24 |
| 158 | Development_Dopamine D2 receptor transactivation of EGFR                       | 0.042 | 0.13 | 2 | 24 |
| 159 | Immune response_IL-33 signaling pathway                                        | 0.043 | 0.13 | 3 | 57 |
| 160 | Development_Prolactin receptor signaling                                       | 0.044 | 0.14 | 3 | 58 |
| 161 | Cell cycle_Initiation of mitosis                                               | 0.045 | 0.14 | 2 | 25 |
| 162 | G-protein signaling_TC21 regulation pathway                                    | 0.045 | 0.14 | 2 | 25 |
| 163 | G-protein signaling_R-RAS regulation pathway                                   | 0.045 | 0.14 | 2 | 25 |

|     |                                                                           |       |      |   |    |
|-----|---------------------------------------------------------------------------|-------|------|---|----|
| 164 | Apoptosis and survival_Apoptotic Activin A signaling                      | 0.045 | 0.14 | 2 | 25 |
| 165 | Development_Angiotensin signaling via beta-Arrestin                       | 0.045 | 0.14 | 2 | 25 |
| 166 | Immune response_IL-18 signaling                                           | 0.048 | 0.14 | 3 | 60 |
| 167 | Immune response_IL-17 signaling pathways                                  | 0.048 | 0.14 | 3 | 60 |
| 168 | Cell adhesion_Cadherin-mediated cell adhesion                             | 0.049 | 0.14 | 2 | 26 |
| 169 | Development_Cross-talk between VEGF and Angiopoietin 1 signaling pathways | 0.049 | 0.14 | 2 | 26 |

## 1. Supplementary figure legends.

### **Supplementary Figure S1. Verification of differential protein expression by Western blotting.** (A)

Lysates from all 9 M-CLL and 9 UM-CLL samples were subjected to immunoblotting for 3 proteins found by iTRAQ-MS to be differentially expressed with  $P$  values of  $<0.001$  (MNDA 50kDa; P41218), 0.019 (LEF-1 48kDa and  $\Delta$ LEF-1 38kDa; Q9UJU2) and 0.004 (TCL-1 14kDa; P56279). (B) Two-tailed Mann Whitney  $U$ -tests were used to determine statistical differences between the median values of optical density, normalised against  $\beta$ -actin, for UM-CLL and M-CLL samples. MNDA, LEF-1 and TCL-1 were all found to be differentially expressed by immunoblotting with  $P$  values of 0.011, 0.004 and 0.024, respectively. In keeping with the iTRAQ-MS data, levels of LEF-1 and TCL-1 were higher in UM-CLL whereas levels of MNDA were lower.

### **Supplementary Figure S2. PANTHER classification of differentially expressed proteins.** Proteins

found to be differentially expressed between UM-CLL and M-CLL ( $p < 0.05$ ) were categorised by their molecular functions using the PANTHER classification system. (A) Pie chart of Gene Ontology (GO) molecular functions of the 127 proteins which were expressed at a higher level in UM-CLL showing that 38% of these proteins were involved in binding and 35% in catalytic activity. (B) Pie chart of GO molecular functions of the 147 proteins which were expressed at a lower level in UM-CLL showing that 33% of these proteins were involved in binding and 29% in catalytic activity. A greater number of proteins under-expressed in UM-CLL cells were involved in structural molecule activity (GO:0005198) (compare 17% in b to 6% in a). 96% of the proteins involved in structural molecular activity that were under-expressed in UM-CLL cells were associated with structural components of the cytoskeleton (GO:0005200), whereas 86% of the proteins involved in structural molecular activity that were over-expressed in UM-CLL cells were associated with structural components of the ribosome (GO:0003735) (data not shown). (C) Bar charts showing the specific binding (GO:0005488) and catalytic (GO:0003824) functions associated with proteins expressed at higher levels in UM-CLL cells. The majority of these proteins are involved in nucleic acid binding and RNA splicing factors activity suggesting higher levels of transcriptional and translational activities in UM-CLL cells. (D) Bar chart showing the binding and catalytic functions associated with proteins expressed at lower levels in UM-CLL cells. The majority of these proteins are involved in protein binding (mostly to cytoskeletal proteins (GO:0008092) (data not shown)) and transferase activity.

### **Supplementary Figure S3. Functional analysis of CCL21/CCR7-mediated migration.** (A) Thirty CLL

samples (15 UM-CLL and 15 M-CLL) were tested for their ability to migrate towards CCL21 using in-vitro transwell assays. For each case, the result was taken as the average of three technical replicates. The median migration index of M-CLL and UM-CLL cells were 25 and 15, respectively

(grand median of 16.3). (B) Surface expression of the CCL21 receptor, CCR7, was measured by flow cytometry. The receptor was expressed at similar levels on M-CLL and UM-CLL samples.

**Supplementary Figure S4. Enrichment of the BCR immune response pathway by proteins differentially expressed in M-CLL versus UM-CLL.** GeneGo pathway analysis showed that the immune response pathway involving BCR signalling was significantly enriched ( $P=0.006$ ) by proteins differentially expressed between UM-CLL and M-CLL. Within this pathway, immunoglobulin  $\mu$  heavy chain C region (IGHM, P01871) was expressed at higher levels in UM-CLL compared to M-CLL samples ( $P=0.015$ ), whereas two cellular inhibitors of Lyn, receptor-type tyrosine-protein phosphatase C (CD45, P08575) and tyrosine-protein phosphatase non-receptor type 6 (SHP-1, P29350), were under-expressed ( $P$  values of 0.009 and 0.001, respectively).

**Supplementary Figure S5. Enrichment of the Endoplasmic reticulum stress response pathway (apoptosis and survival) by proteins differentially expressed in M-CLL versus UM-CLL.** GeneGo pathway analysis showed that the ER stress response pathway was significantly enriched ( $P=0.035$ ) by proteins differentially expressed between UM-CLL and M-CLL. Within this pathway endoplasmic reticulum chaperone protein (P14625), which stimulates protein folding and thereby protects cells against apoptosis triggered by the unfolded protein response, was over-expressed in UM-CLL cells ( $P=0.012$ ). Furthermore, the pro-apoptotic molecules BH3-interacting domain death agonist (BID, P55957) and apoptotic protease-activating factor 1 (APAF1, O14727), were both expressed at significantly lower levels in UM-CLL cells ( $P$  values of 0.018 and 0.036, respectively).

A

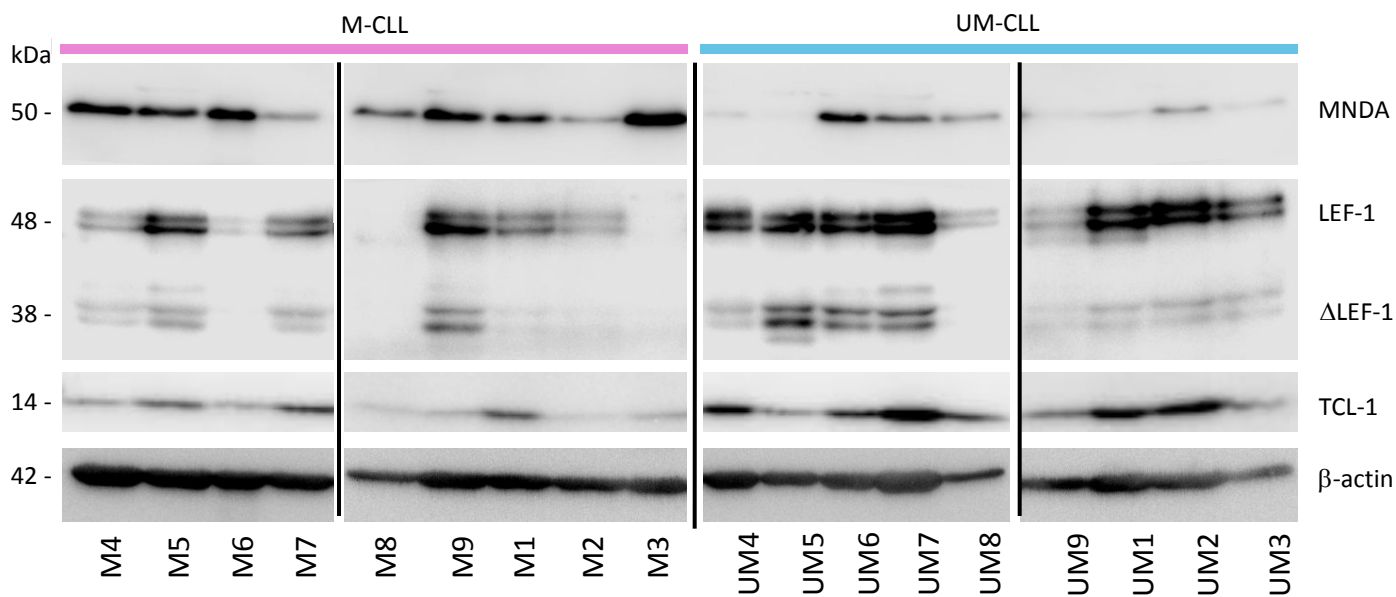

B

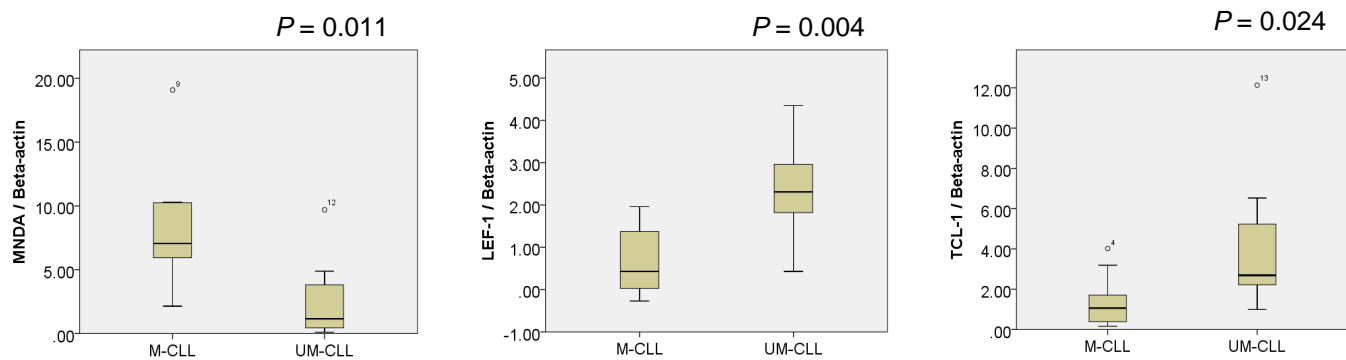

A

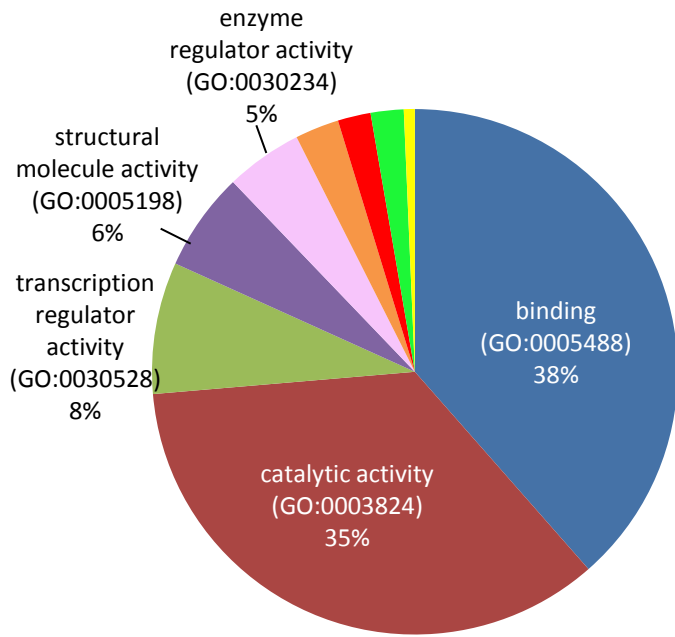

Molecular functions of proteins with significantly higher levels of expression in UM-CLL

B

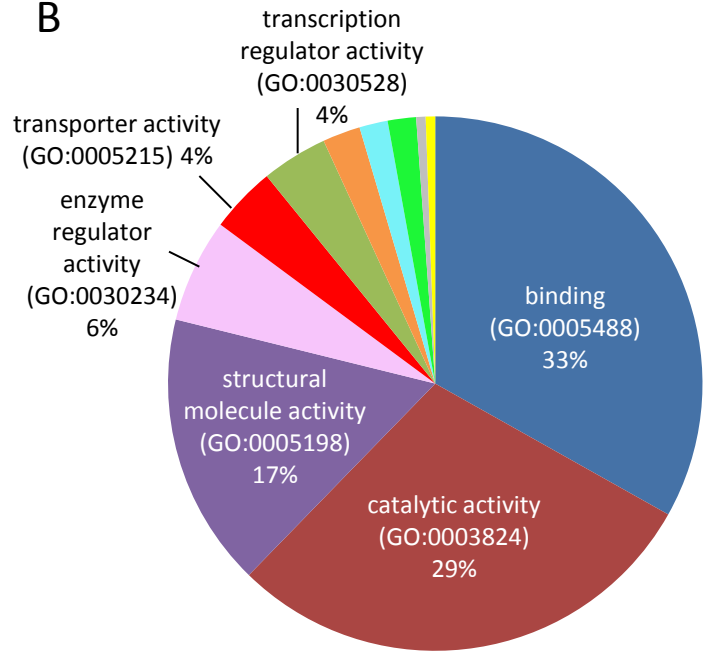

Molecular functions of proteins with significantly lower levels of expression in UM-CLL

C

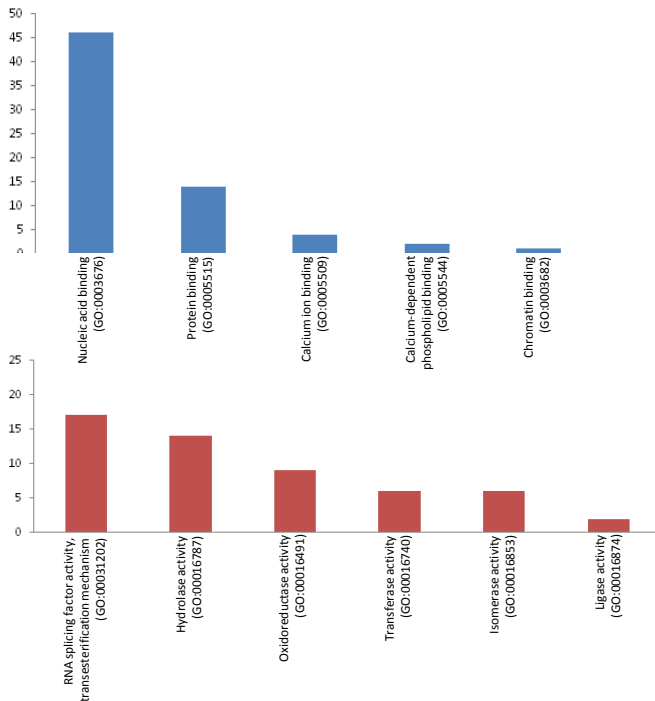

Binding and catalytic activities of proteins with significantly higher levels of expression in UM-CLL

D

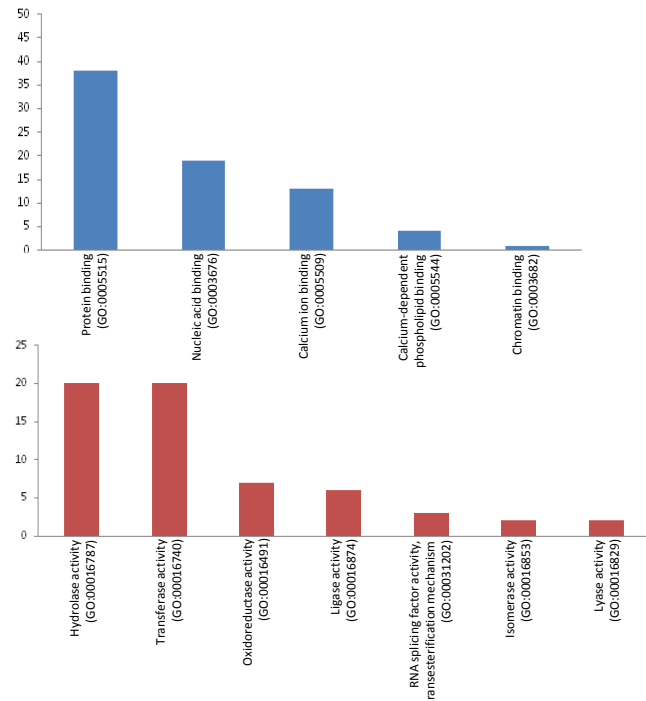

Binding and catalytic activities of proteins with significantly lower levels of expression in UM-CLL

A

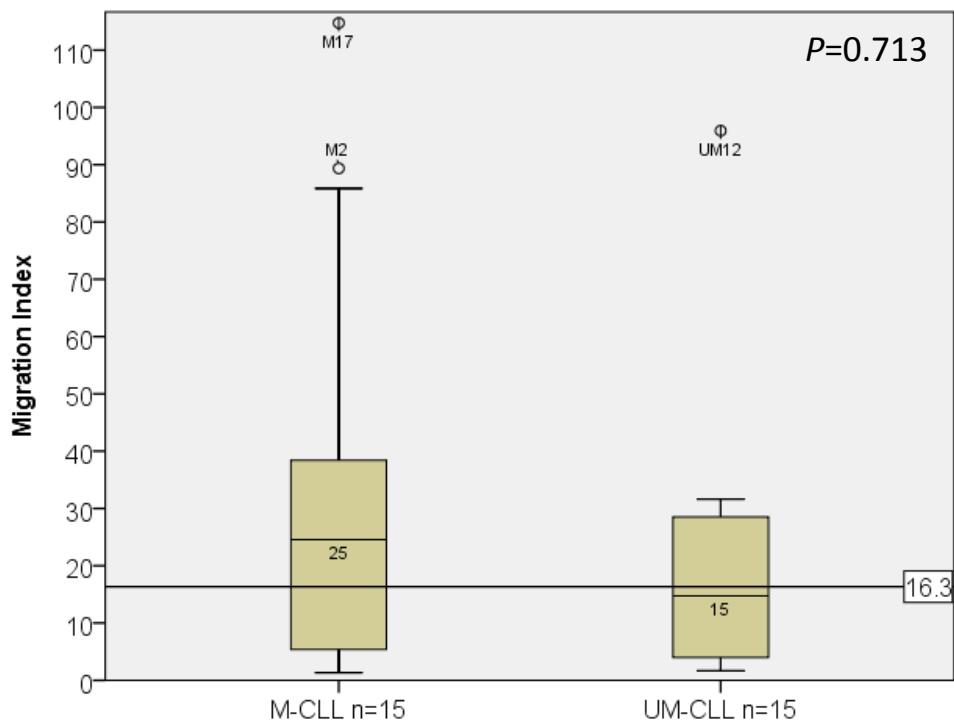

B

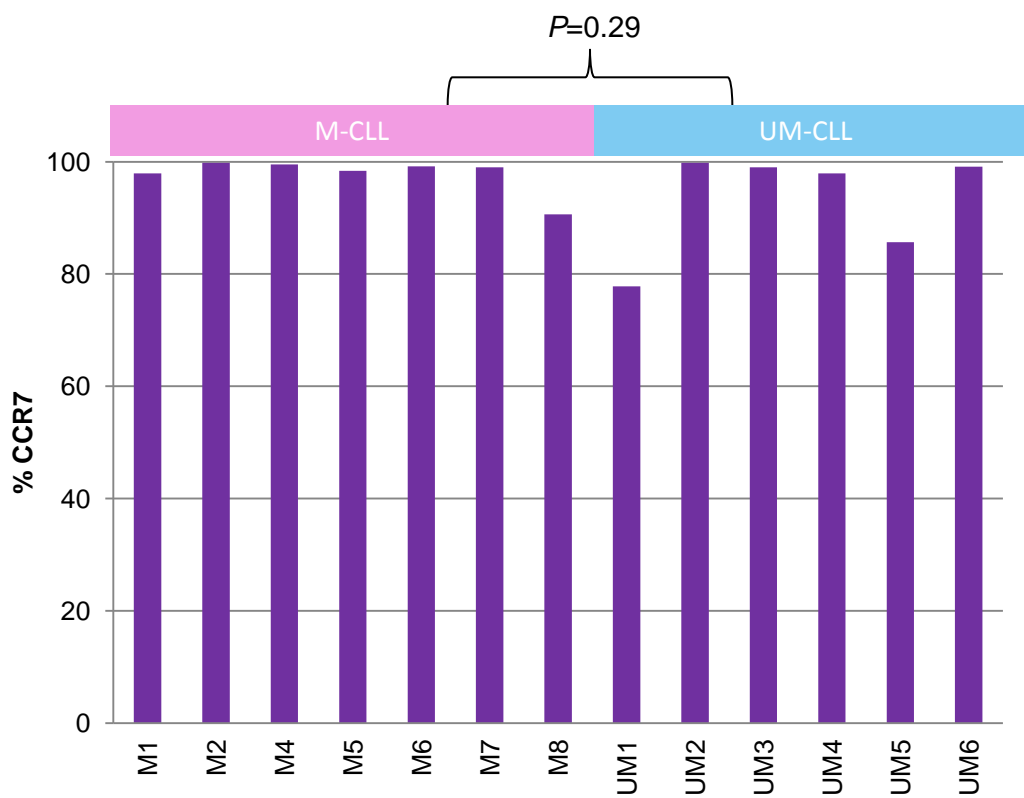



Figure S4

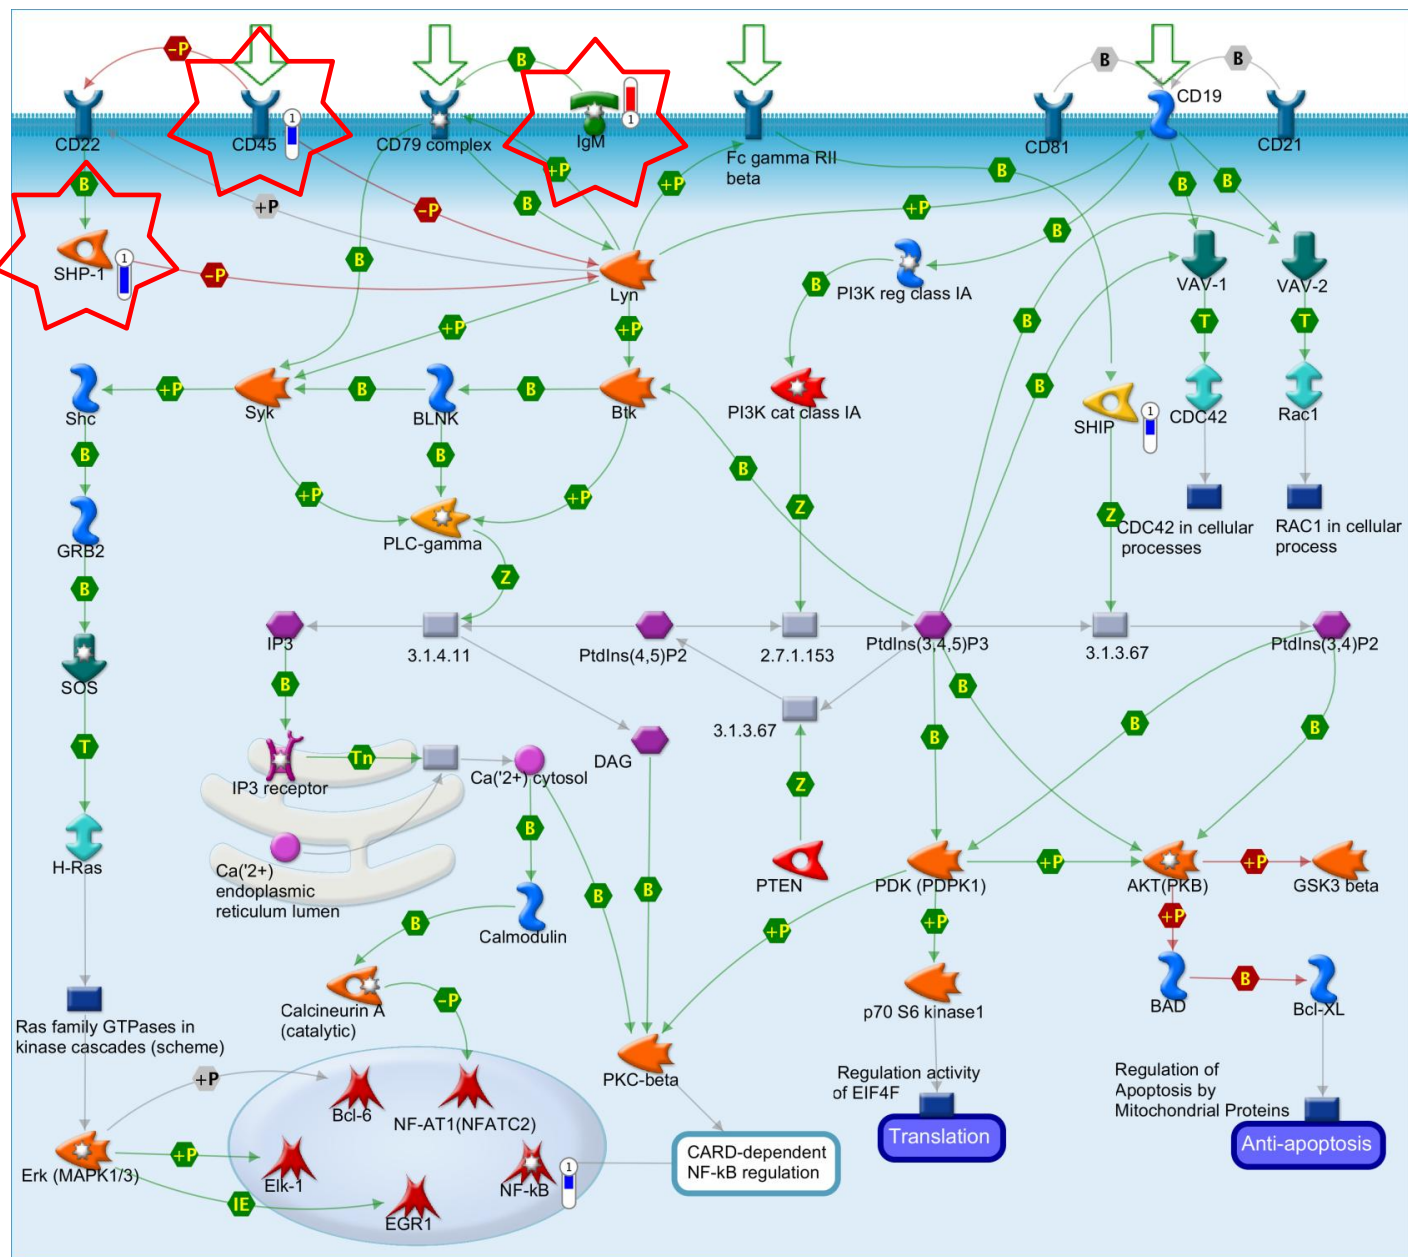

Higher expression in UM-CLL  
 Lower expression in UM-CLL

Enzymes  
 Protein kinase  
 Protein phosphatase

Receptor  
 Ligand  
 Binding proteins

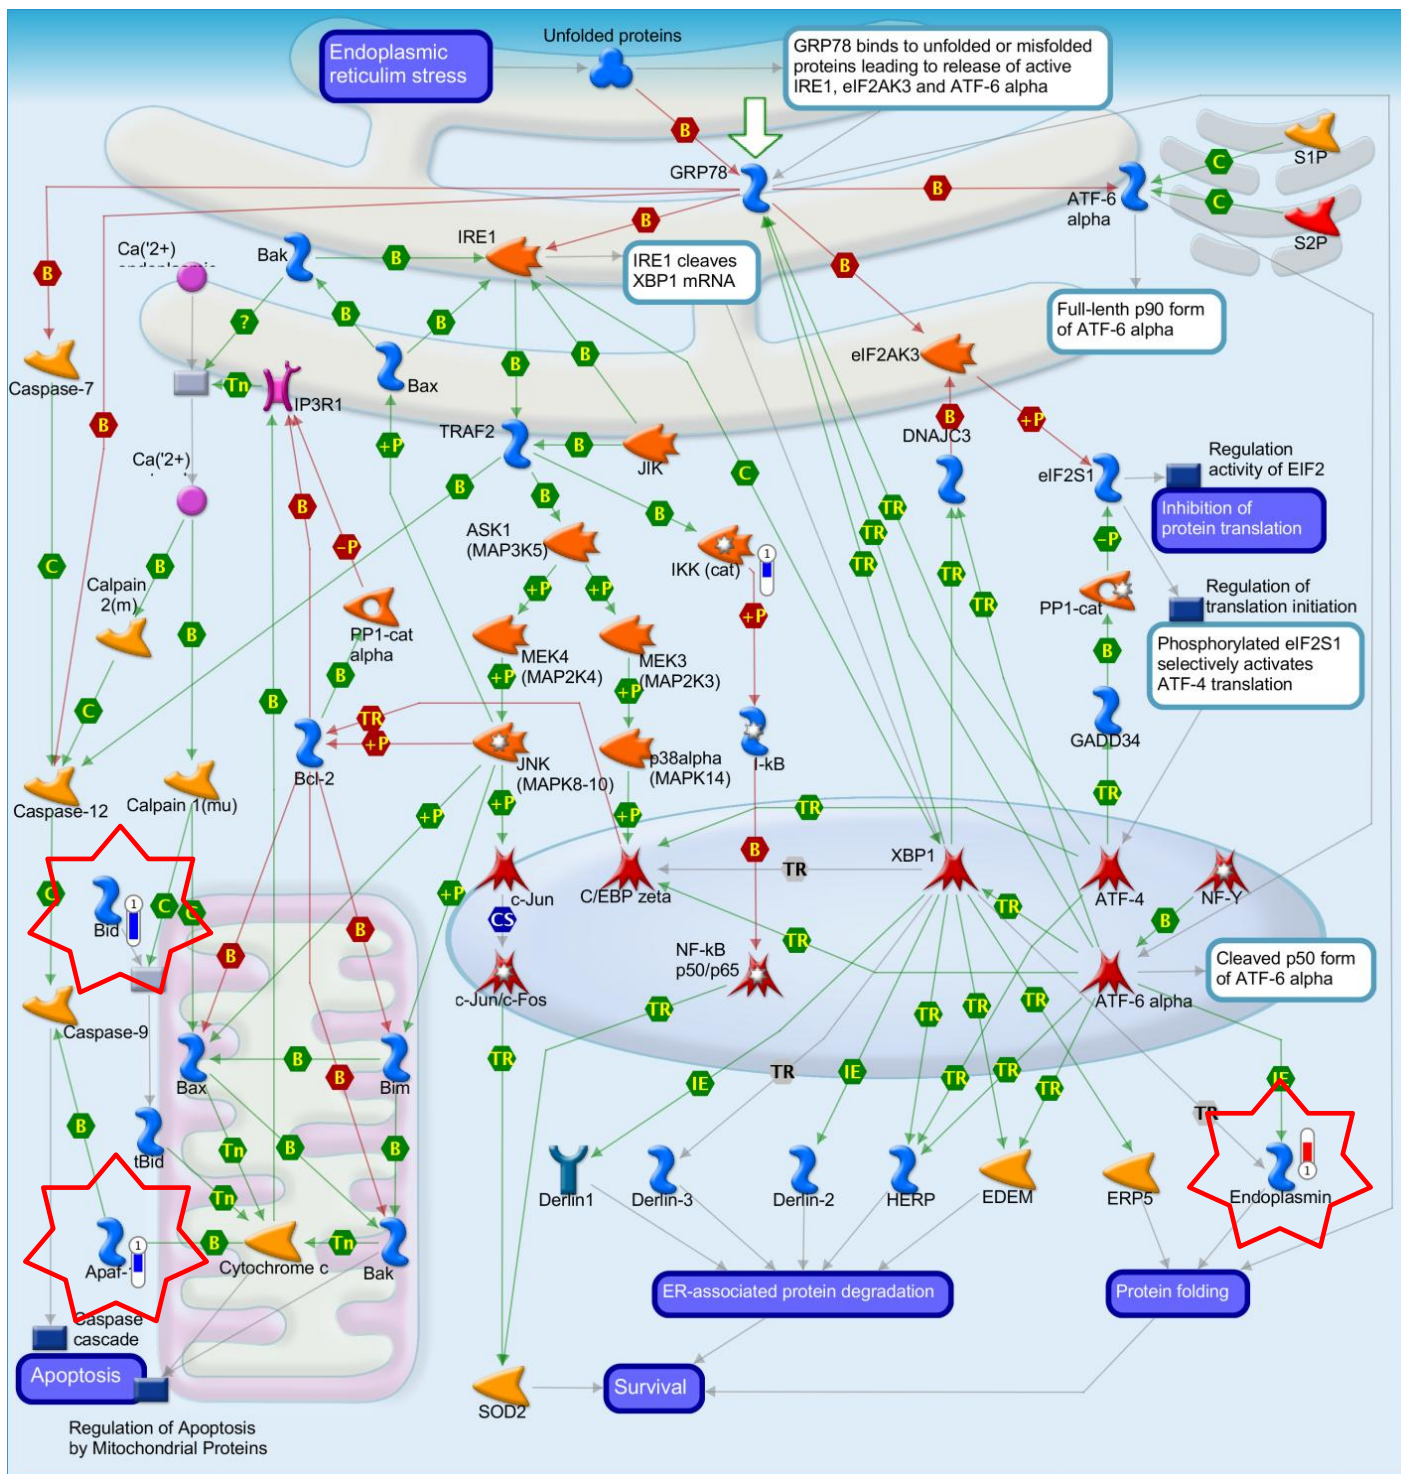

Higher expression in UM-CLL  
 Lower expression in UM-CLL

Enzymes  
 Transcription factor  
 Binding proteins  
 Protein kinase  
 Generic protease
